# Supplementary material for: Key morphological features of human pyramidal neurons
Source: PubMed Central journal article supplement — Cereb Cortex. 2024 May 14;34(5):bhae180. doi: 10.1093/cercor/bhae180 (PMC11094408; doi:10.1093/cercor/bhae180), 2024-05-14
Supplement: benavides-piccione_r_suppl_figures_and_tables_bhae180.pdf [file benavides-piccione_r_suppl_figures_and_tables_bhae180.pdf]

## **SUPPLEMENTARY FIGURES AND TABLES**

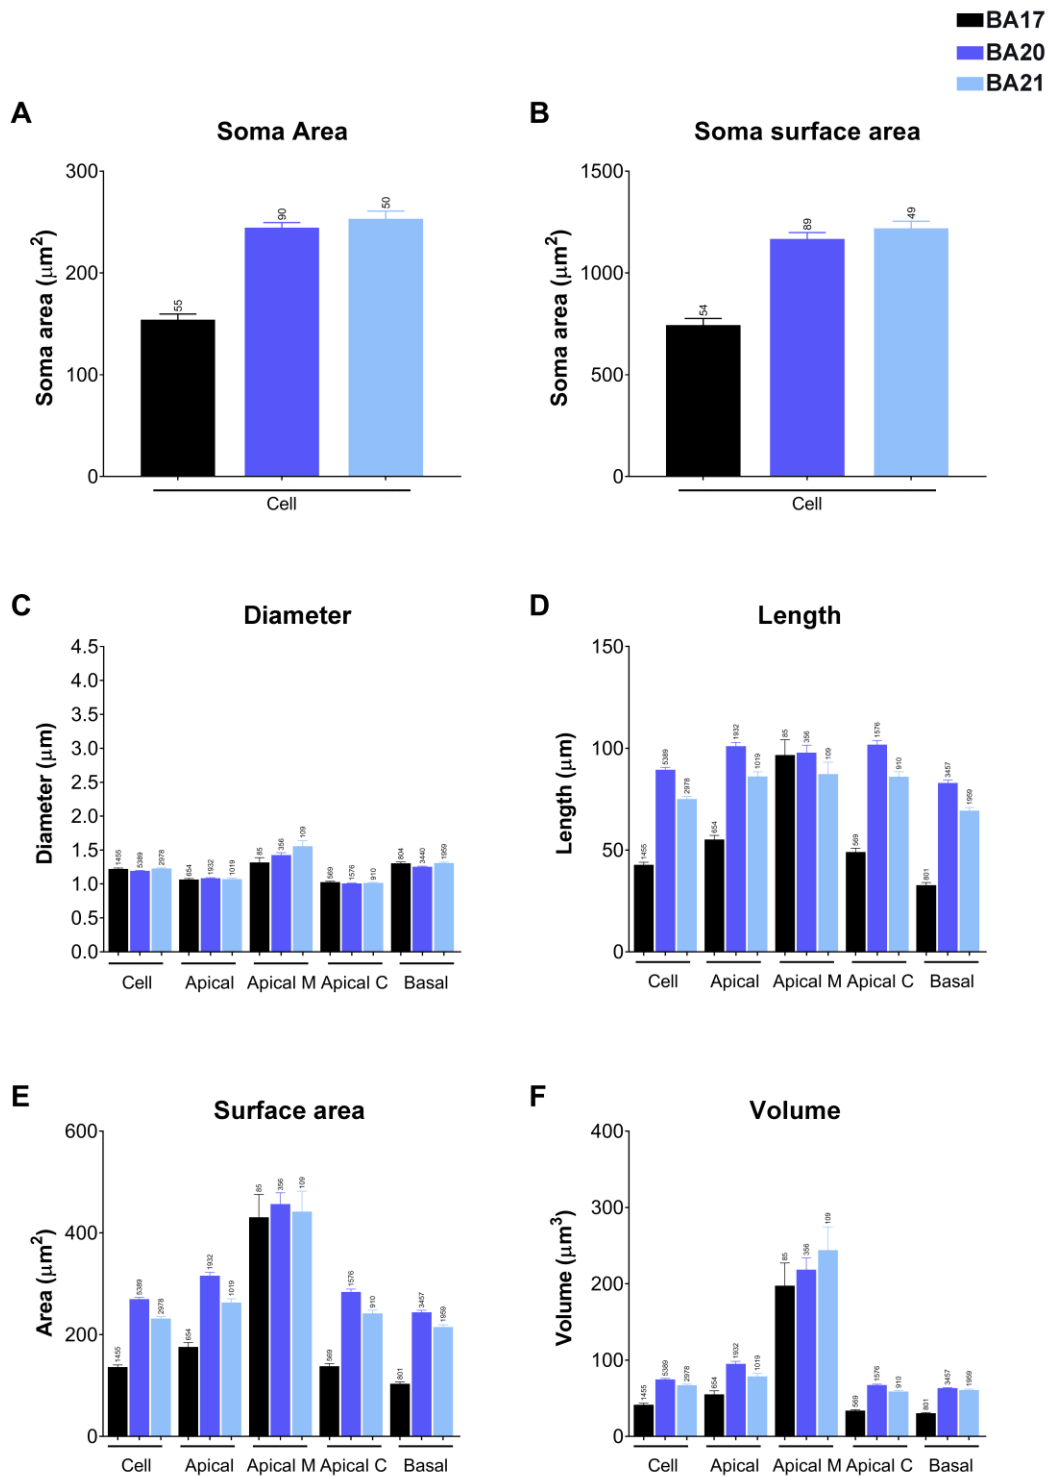

**Supplementary Figure 1.** Graphs showing soma cross-sectional area (A), soma surface area (B), dendritic segment average diameter (C), segment length (D), segment surface area (E), and segment volume (F), expressed per cell and per dendritic compartment: apical arbor (including main apical dendrite and apical collateral dendrites together); main apical dendrite alone (Apical M); apical collateral dendrites alone (Apical C); and basal dendritic arbor. Measurements are reported as mean  $\pm$  SEM. Only dendritic segments that were complete, and thus excluding incomplete endings, were included in this analysis. The statistical significance of the differences is shown in Supplementary Table 1.

## BA17 main apical dendrite dendrogram examples

### 0 branching

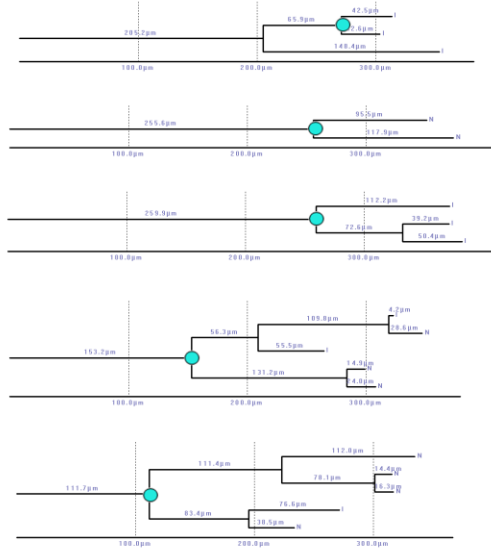

### 1 branching

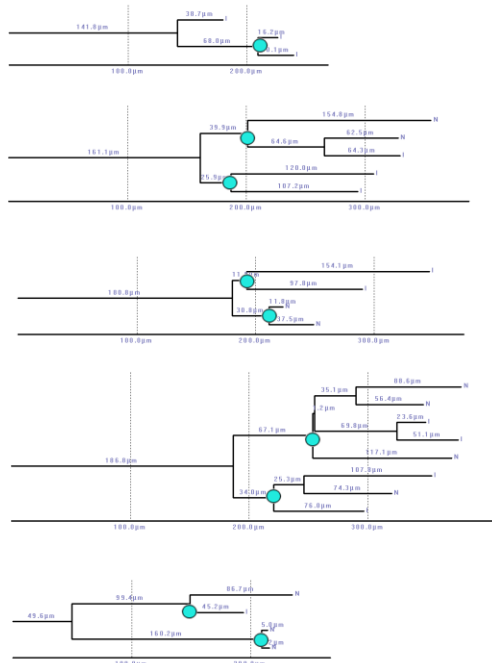

**Supplementary Figure 2.** Dendrogram examples of main apical dendrites that had 0 bifurcations and 1 bifurcation (within the first 200 μm) from the 3D reconstructed dataset of human BA17 pyramidal neurons. Two and three bifurcations were absent.

## BA20/21 main apical dendrite dendrogram examples

### 0 branching

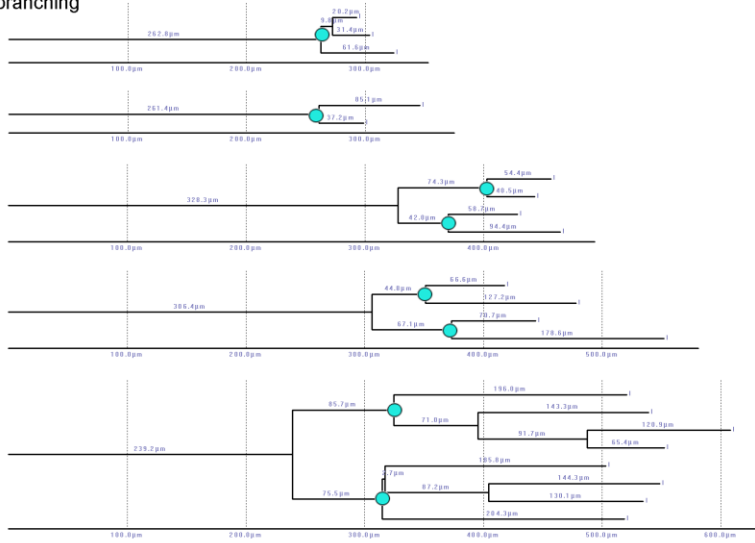

### 1 branching

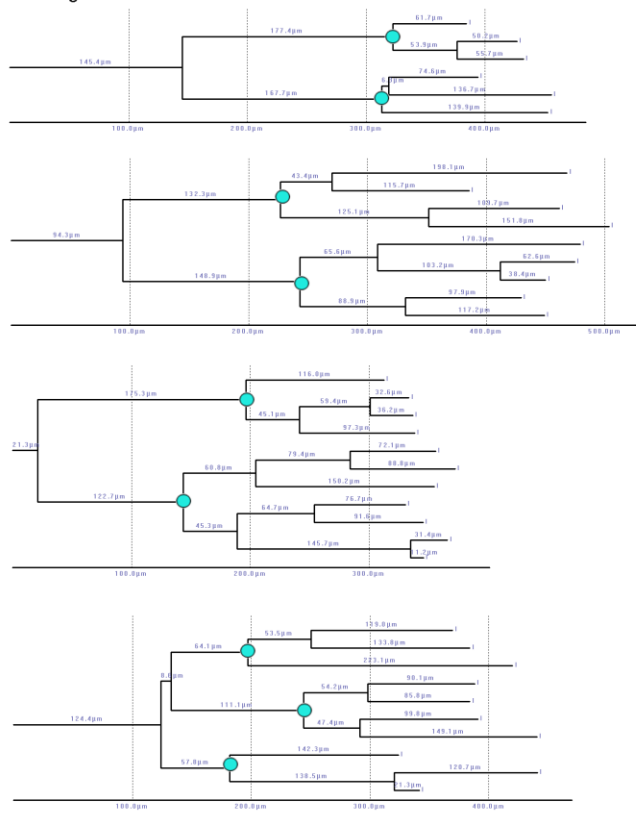

Cont.

Cont.

BA20/21 main apical dendrite dendrogram examples

2 branching

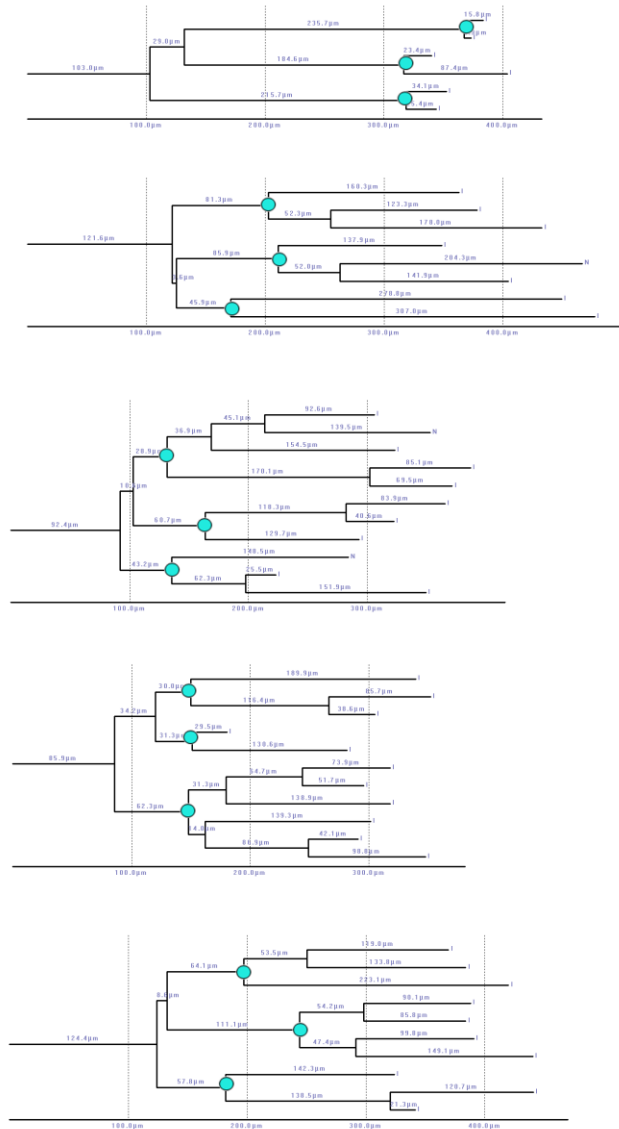

**Supplementary Figure 3.** Dendrogram examples of main apical dendrites that had 0 bifurcations, 1 bifurcation and 2 bifurcations (within the first 200 µm) from the 3D reconstructed dataset of human BA20 and BA21 pyramidal neurons.

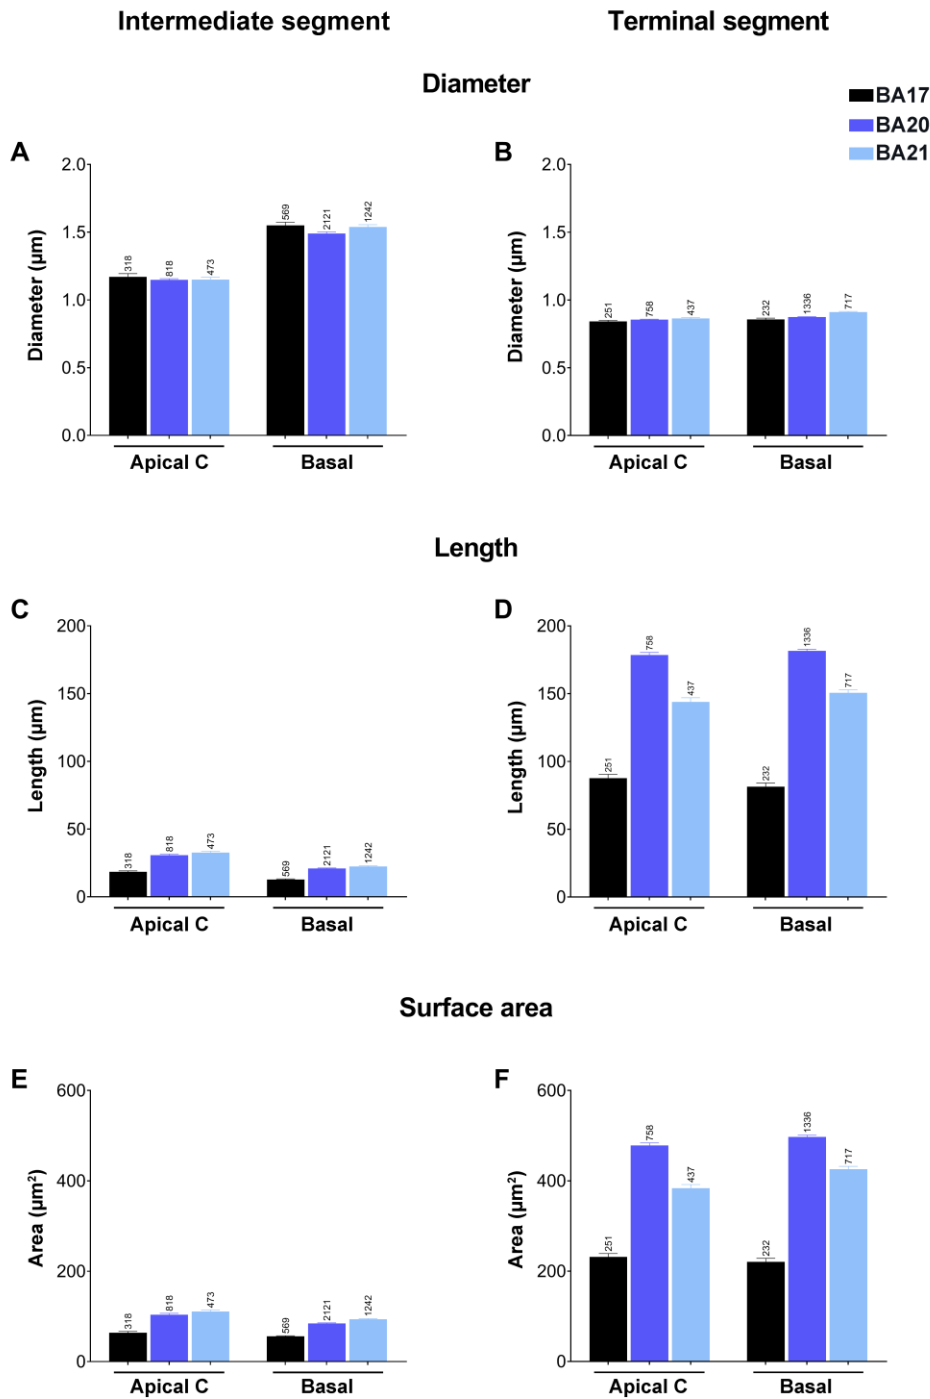

**Supplementary Figure 4.** Graphs showing intermediate (A, C, E) versus terminal segment (B, D, F) diameters (A, B), lengths (C, D) and surface area (E, F) for apical collateral (apical C) and basal dendrites from human BA17 (black), BA20 (dark blue) and BA21 (light blue) cortical areas. Measurements are reported as mean ± SEM. Only dendritic segments that were complete, and thus excluding incomplete endings, were included in this analysis. Additional graphs showing intermediate and terminal segment volume are shown in Supplementary Figure 5B, C. The statistical significance of the differences is shown in Supplementary Table 4.

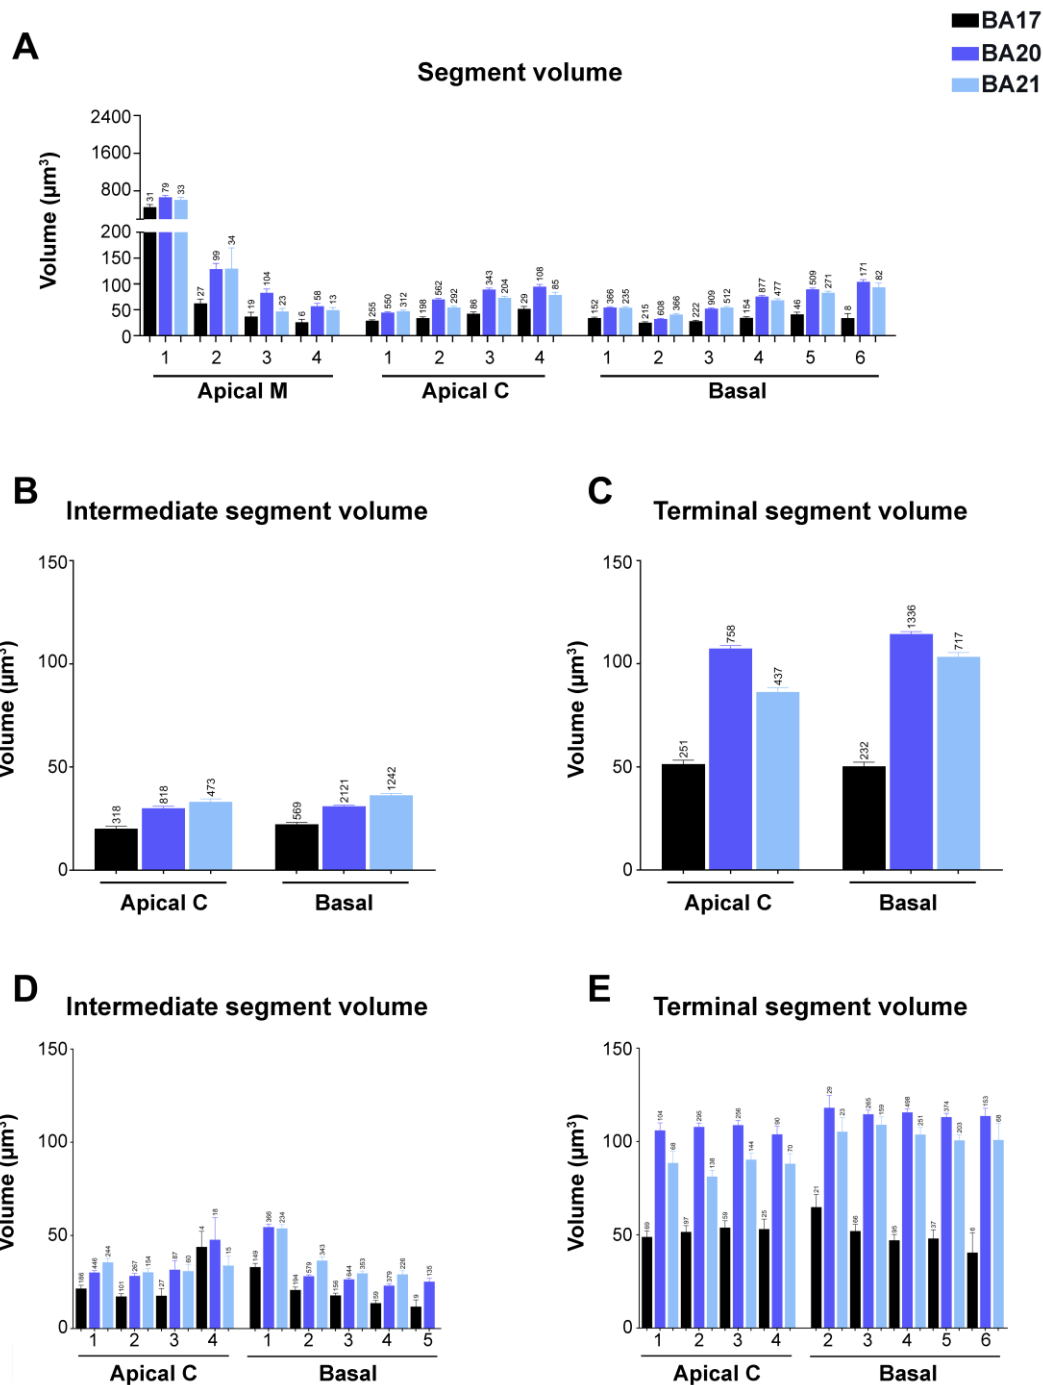

**Supplementary Figure 5.** (A) Graph showing dendritic segment volume, expressed per branch order (1, 2, 3, etc.) and per dendritic compartment: main apical dendrite (Apical M), apical collateral dendrites (Apical C), and basal arbor (Basal) from human BA17 (black), BA20 (dark blue) and BA21 (light blue) cortical areas. (B, C) Graphs showing intermediate (B) versus terminal segment (C) volume for apical C and basal dendrites from the same 3 cortical areas as in A. (D, E) Graphs showing —per branch order— intermediate (D) versus terminal (E) segment volume for the same compartments and cortical areas as in the previous graphs. Measurements are reported as mean  $\pm$  SEM. Only dendritic segments that were complete, and thus excluding incomplete endings, were included in this analysis. The statistical significance of the differences is shown in Supplementary Tables 3, 4.

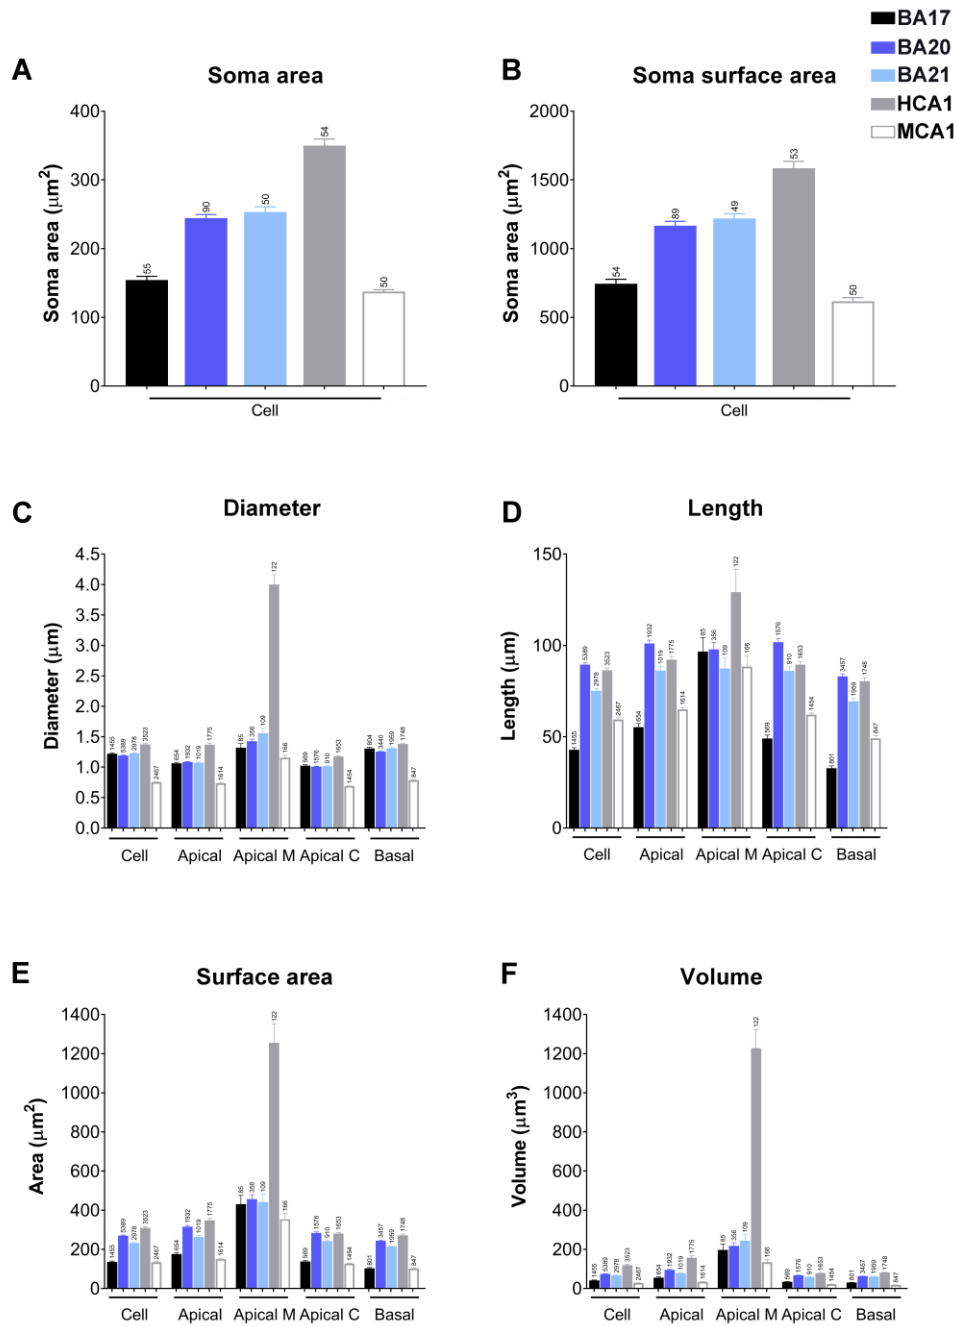

**Supplementary Figure 6.** Graphs showing soma area (A), soma surface area (B), dendritic segment average diameter (C), segment length (D), segment surface area (E), and segment volume (F), expressed per cell and per dendritic compartment: apical arbor (including main apical dendrite and apical collateral dendrites together); main apical dendrite alone (Apical M); apical collateral dendrites alone (Apical C); and basal dendritic arbor from human BA17 (black), BA20 (dark blue), BA21 (light blue) cortical areas and human CA1 (grey) and mouse CA1 (white) regions. Measurements are reported as mean  $\pm$  SEM. Only dendritic segments that were complete, and thus excluding incomplete endings, were included in this analysis. The statistical significance of the differences is shown in Supplementary Tables 1, 6.



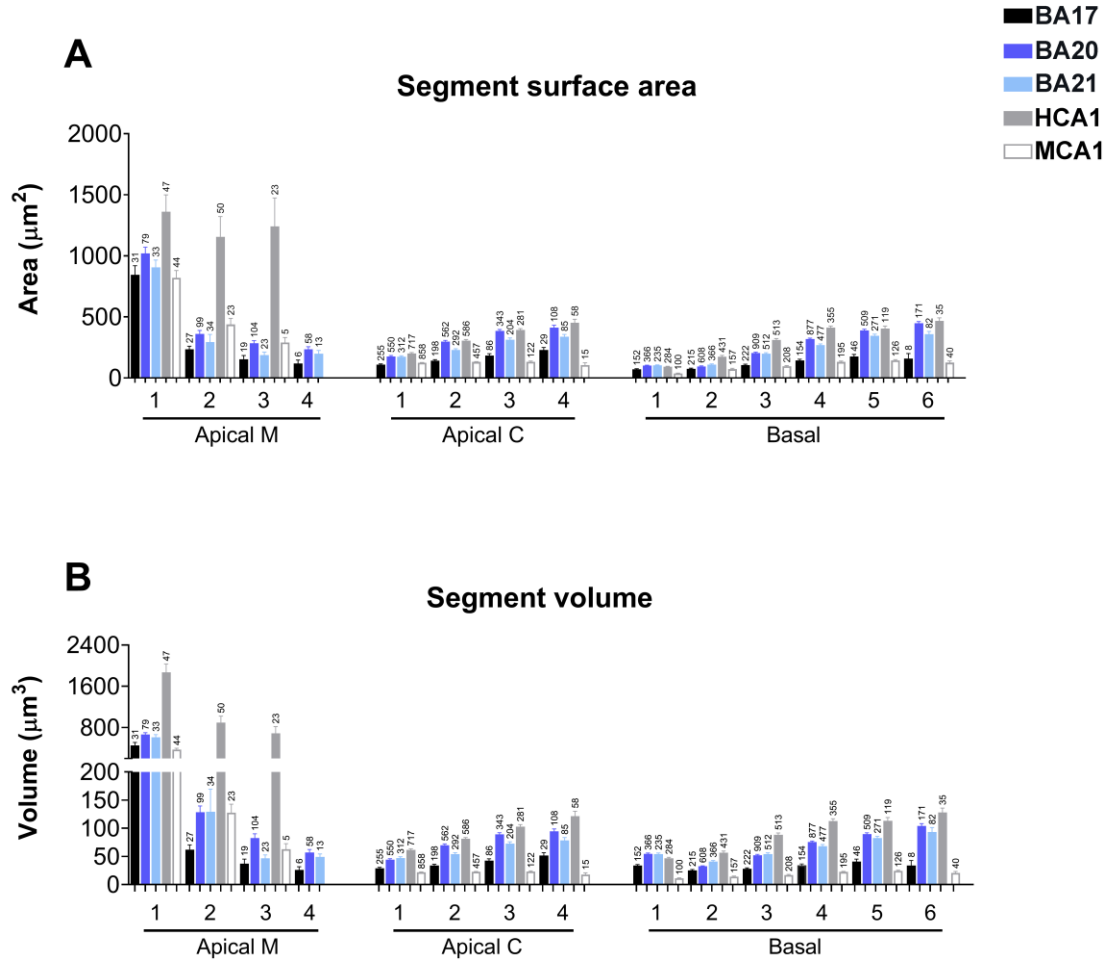

**Supplementary Figure 7.** Graphs —per branch order— showing dendritic segment average surface area (A) and volume (B) per dendritic compartment: main apical dendrite (Apical M), apical collateral dendrites (Apical C), and basal arbor (Basal) from human BA17 (black), BA20 (dark blue), BA21 (light blue) cortical areas and human CA1 (grey) and mouse CA1 (white) regions. Measurements are reported as mean  $\pm$  SEM. Only dendritic segments that were complete, and thus excluding incomplete endings, were included in this analysis. The statistical significance of the differences is shown in Supplementary Table 8.

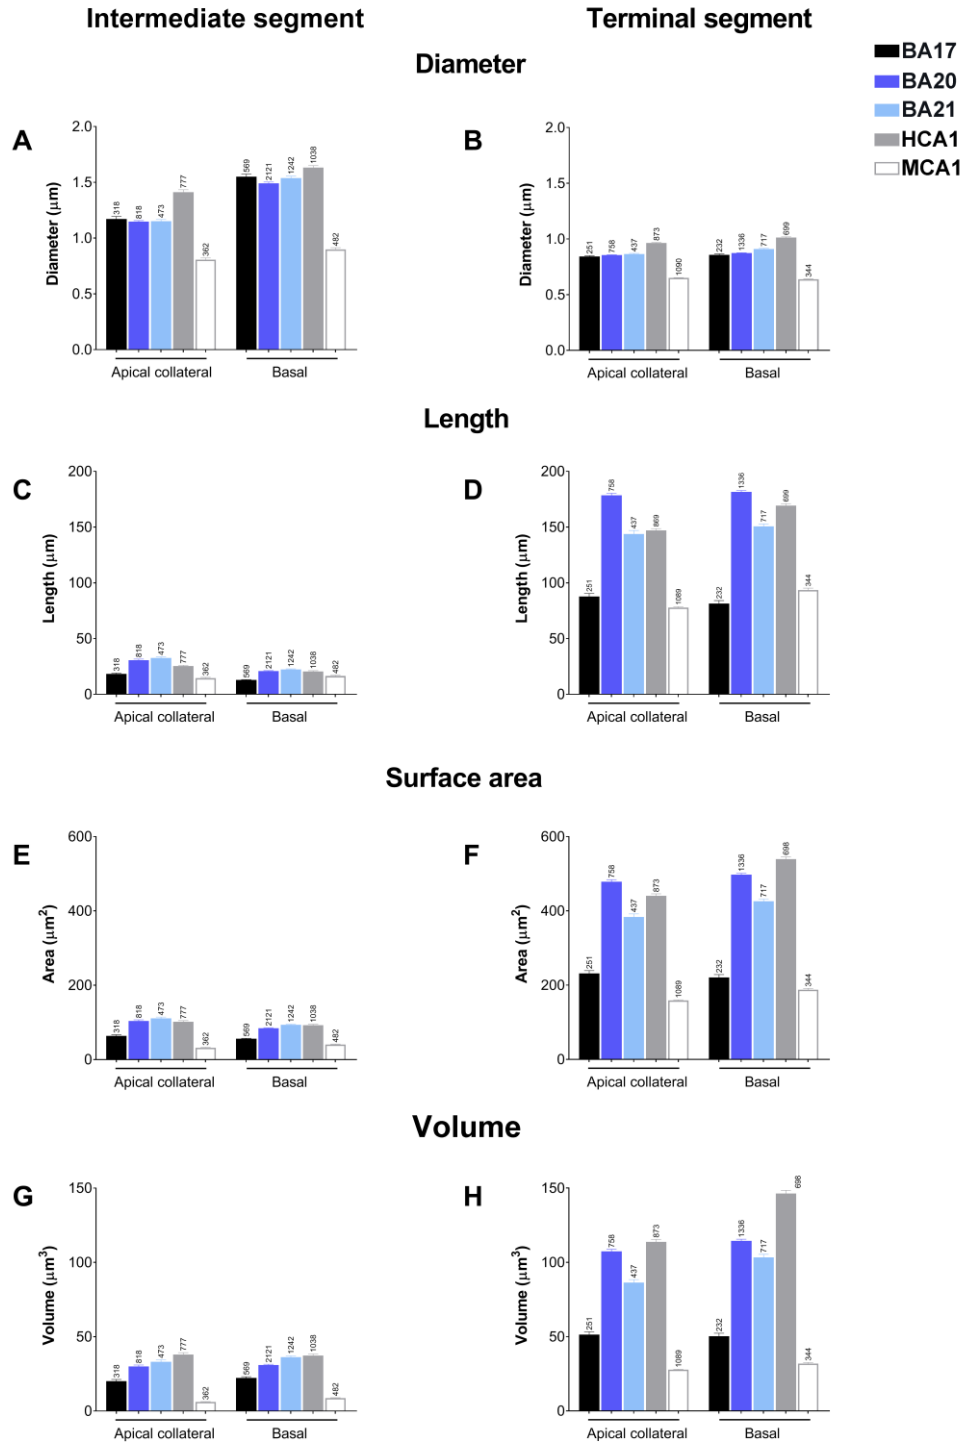

**Supplementary Figure 8.** Graphs showing intermediate (A, C, E, G) versus terminal segment (B, D, F, H) diameters (A, B), lengths (C, D), surface area (E, F) and volume (G, H) for apical collateral (apical C) and basal dendrites from human BA17 (black), BA20 (dark blue), BA21 (light blue) cortical areas and human CA1 (grey) and mouse CA1 (white) regions. Measurements are reported as mean  $\pm$  SEM. Only dendritic segments that were complete, and thus excluding incomplete endings, were included in this analysis.

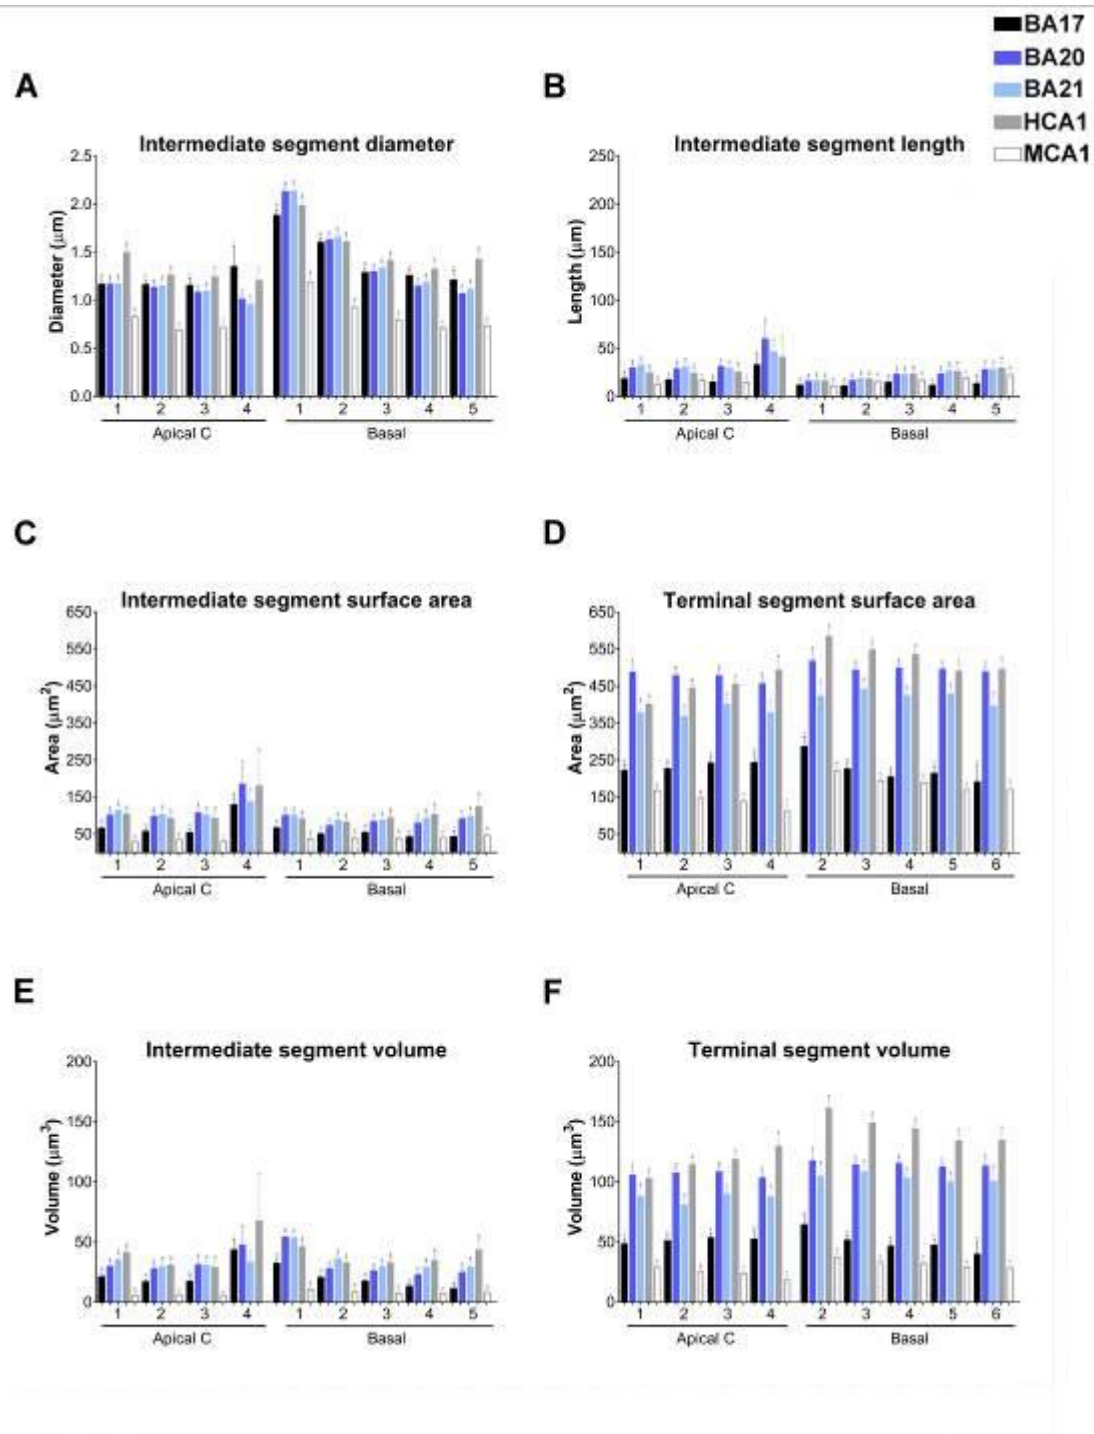

**Supplementary Figure 9.** (A, B) Graphs showing —per branch order— intermediate segment diameter (A) and length (B) for apical collateral (apical C) and basal dendrites from human BA17 (black), BA20 (dark blue), BA21 (light blue) cortical areas and human CA1 (grey) and mouse CA1 (white) regions. (C–F) Graphs showing —per branch order— intermediate (C, E) versus terminal (D, F) segment surface area (C, D) and volume (E, F) for the same compartments and regions as above. Measurements are reported as mean  $\pm$  SEM. Only dendritic segments that were complete, and thus excluding incomplete endings, were included in this analysis.

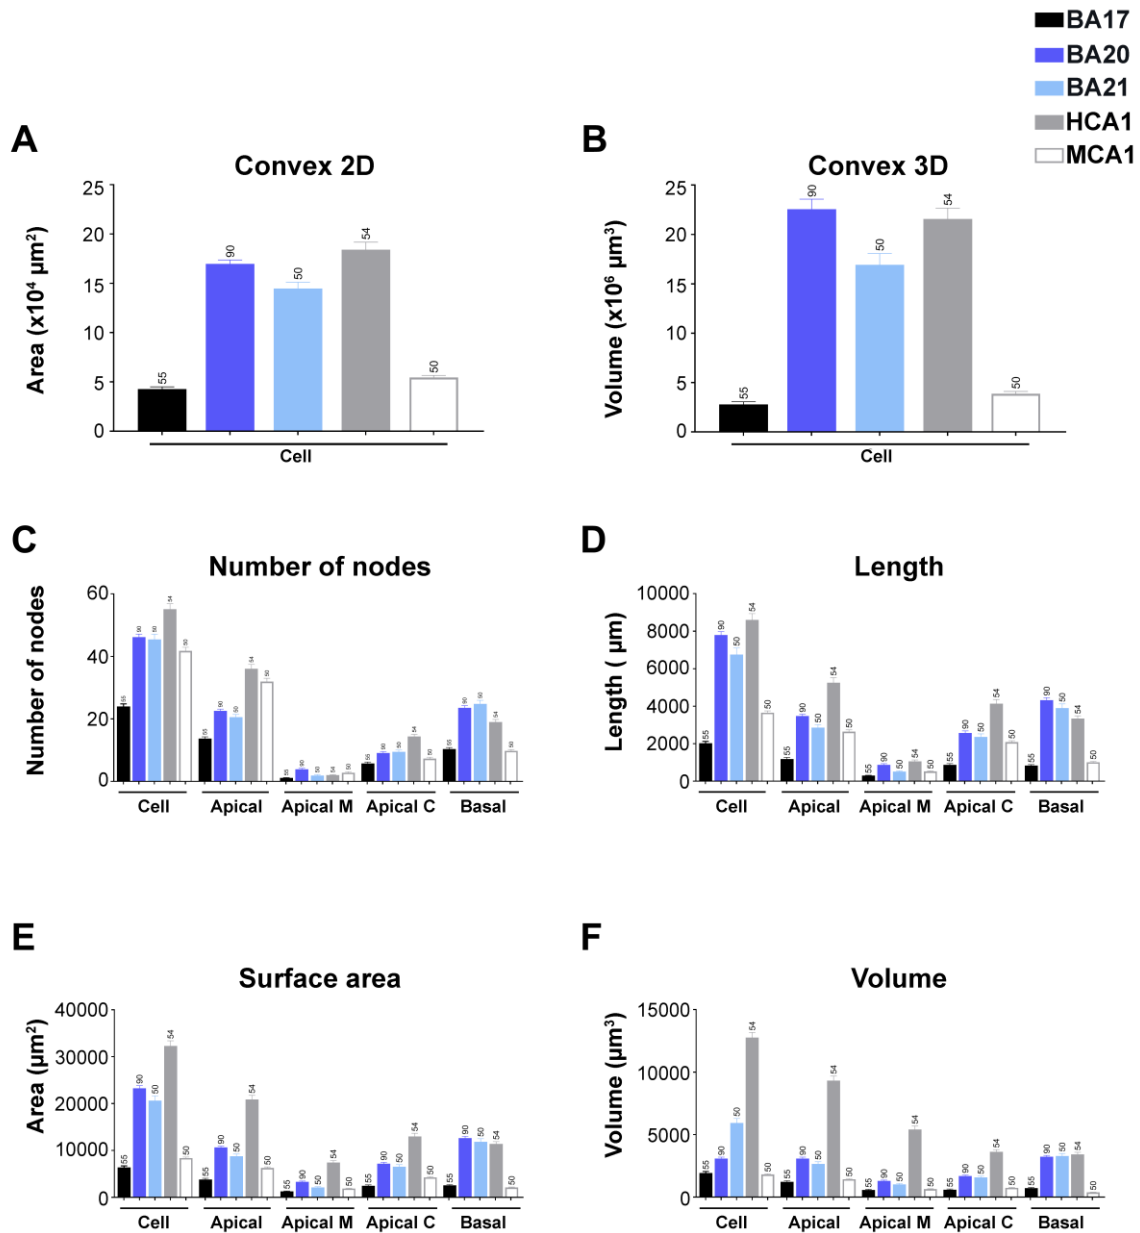

**Supplementary Figure 10.** Graphs showing non-full measurements: convex 2D (A), convex 3D (B), number of nodes (C), dendritic length (D), dendritic surface area (E) and dendritic volume (F) from human BA17 (black), BA20 (dark blue), BA21 (light blue) cortical areas and human CA1 (grey) and mouse CA1 (white) regions.

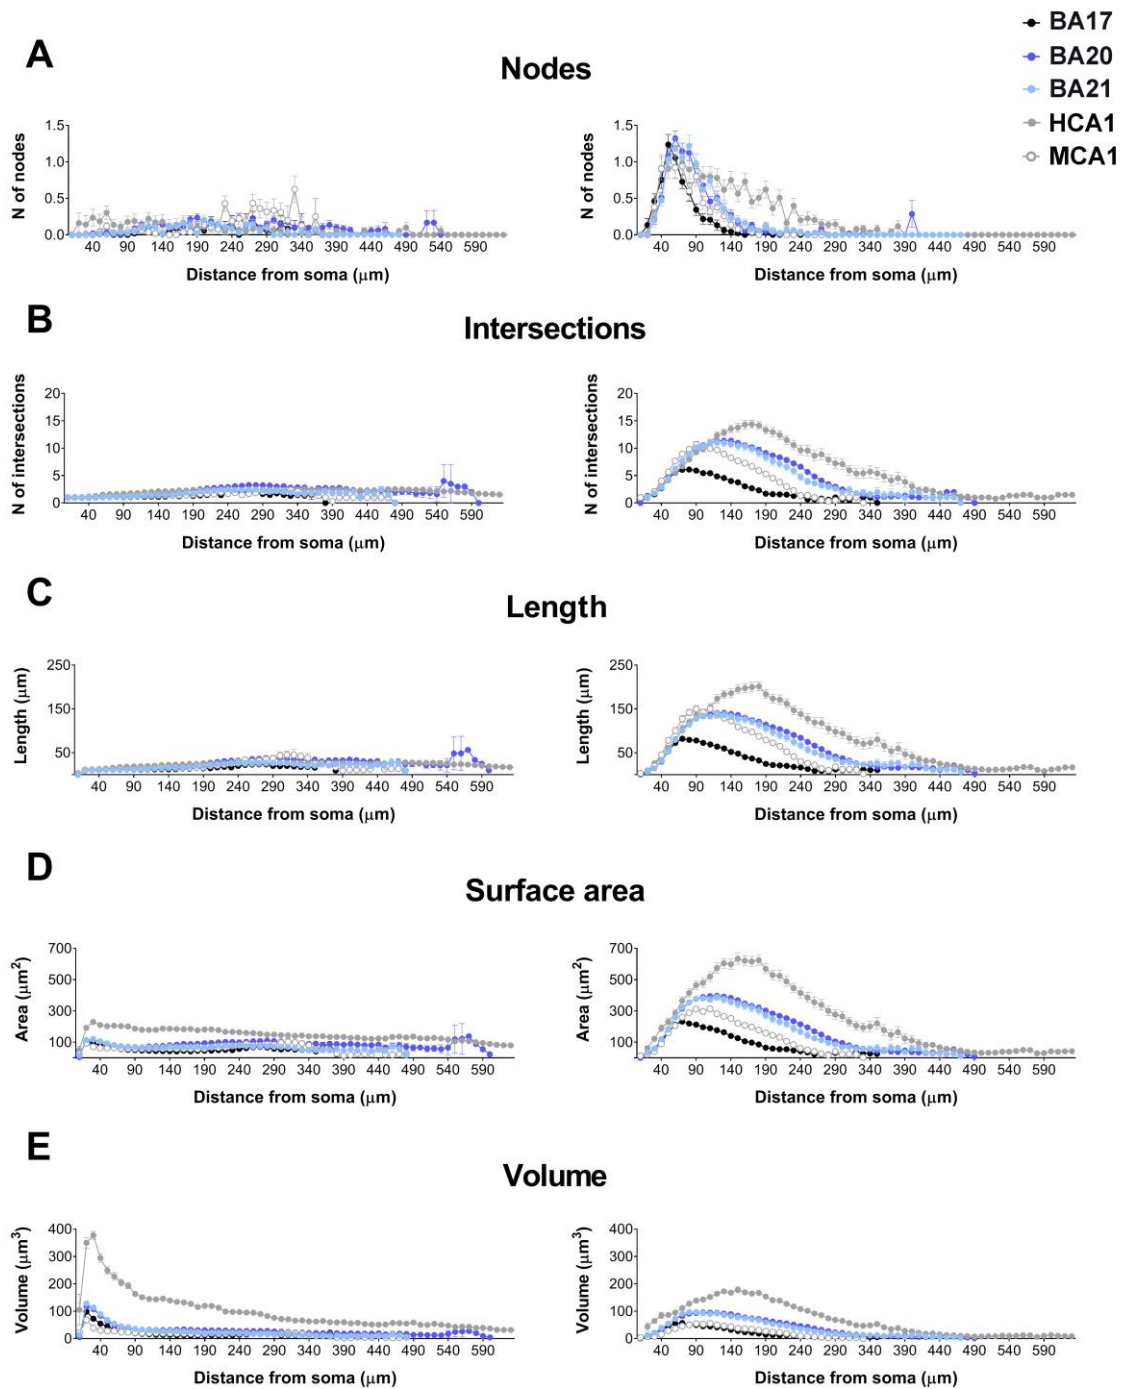

**Supplementary Figure 11.** Graphs showing the number of nodes (A), dendritic intersections (B), dendritic length (C), dendritic surface area (D), and dendritic volume (E) distribution as a function of the distance from the soma in Apical M and Apical C compartments from human BA17 (black), BA20 (dark blue), BA21 (light blue), CA1human (grey) and CA1mouse (white) pyramidal neurons. Measurements are reported as mean  $\pm$  SEM.

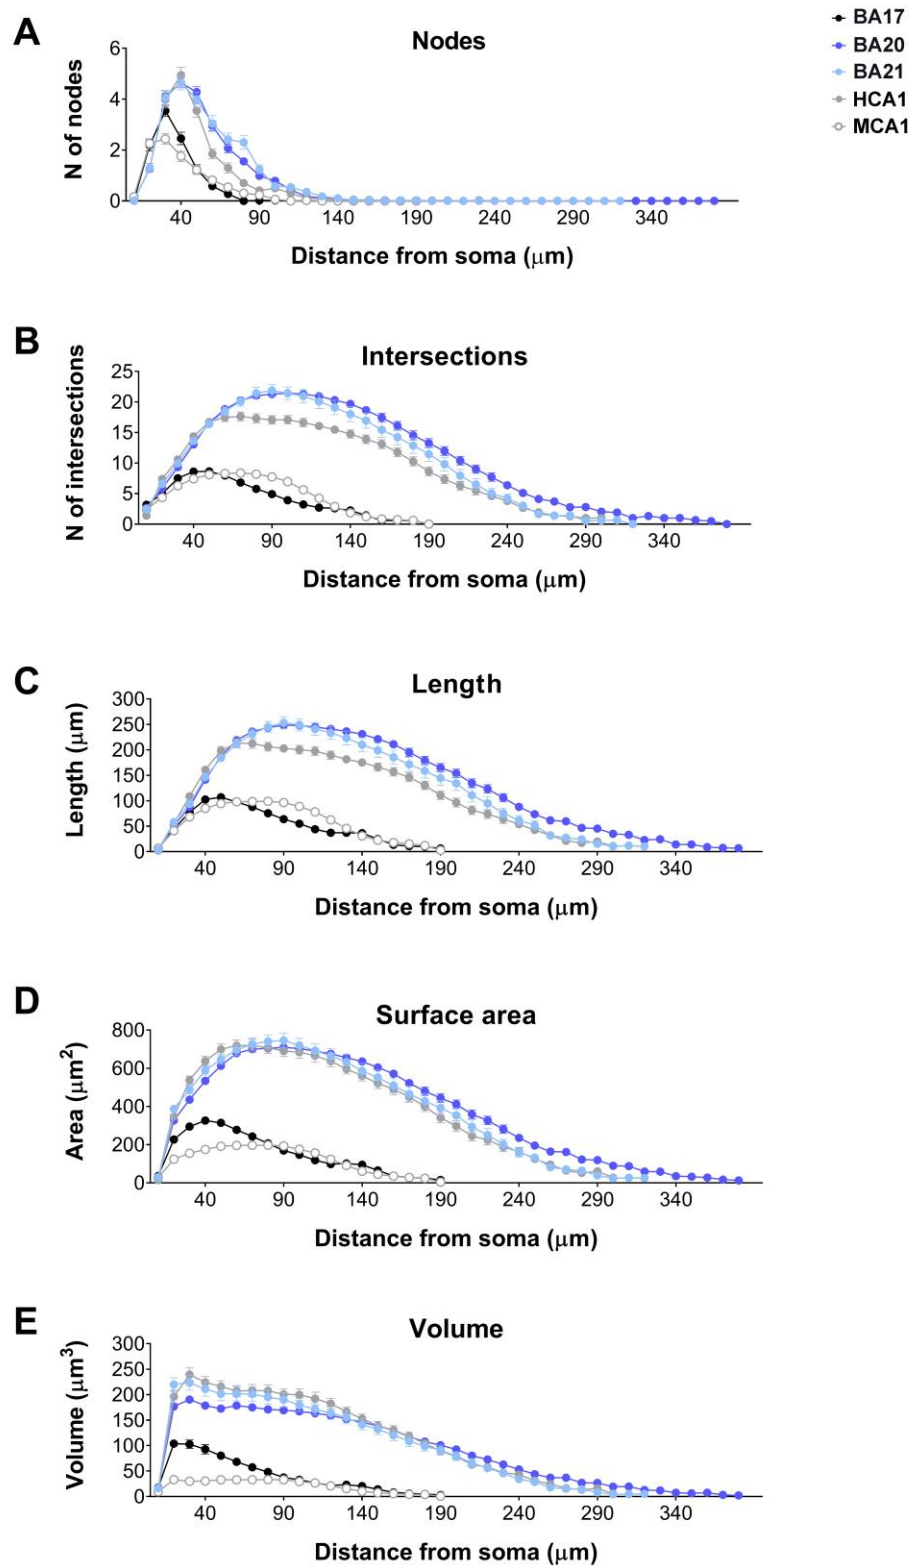

**Supplementary Figure 12.** Graphs showing the number of nodes (A), dendritic intersections (B), dendritic length (C), dendritic surface area (D), and dendritic volume (E) distribution as a function of the distance from soma in basal compartments from human BA17 (black), BA20 (dark blue), BA21 (light blue), CA1human (grey) and CA1mouse (white) pyramidal neurons. Measurements are reported as mean  $\pm$  SEM.

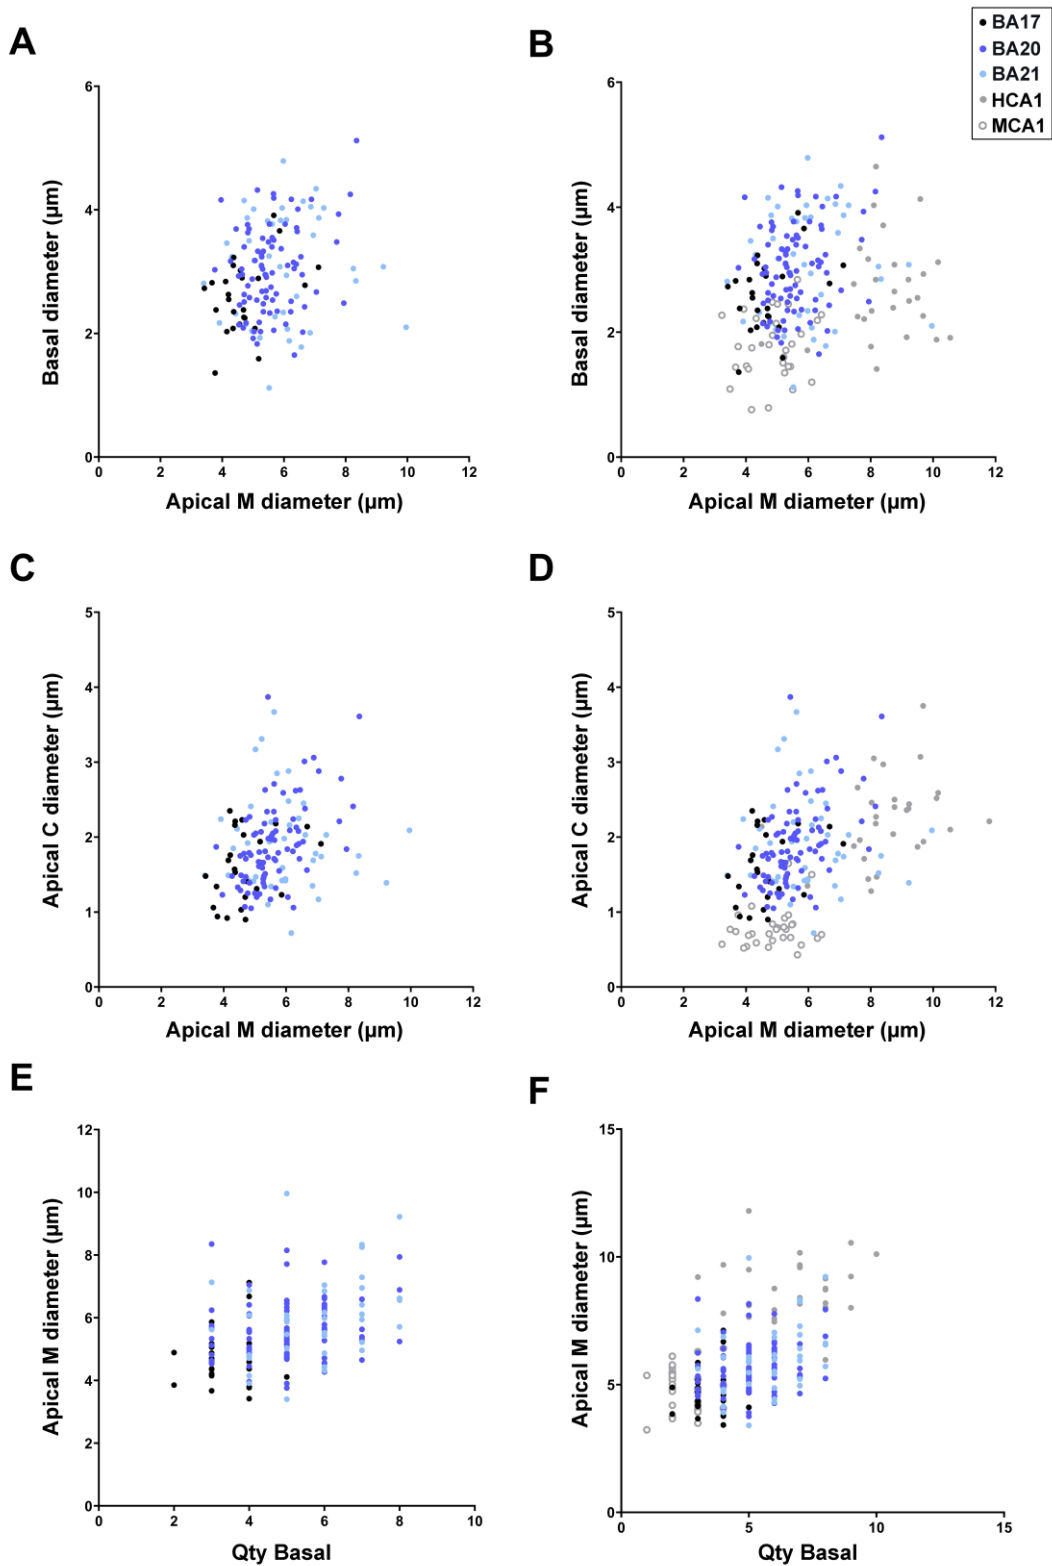

**Supplementary Figure 13.** Correlation analyses between various morphological parameters analyzed. Each point represents the values obtained in one cell from human BA17 (black), BA20 (dark blue), BA21 (light blue) cortical areas (A, C, E; left column). Additional correlations, including human CA1 (grey) and mouse CA1 (open circles) regions, are shown (B, D, F; right column). Qty Basal = n° primary basal dendrites. Significant correlations were classified as weak [Spearman's rho ( $r$ ) value lower than 0.40], moderate ( $0.4 < r < 0.7$ ), and strong ( $r > 0.7$ ). See also Supplementary Table 11.

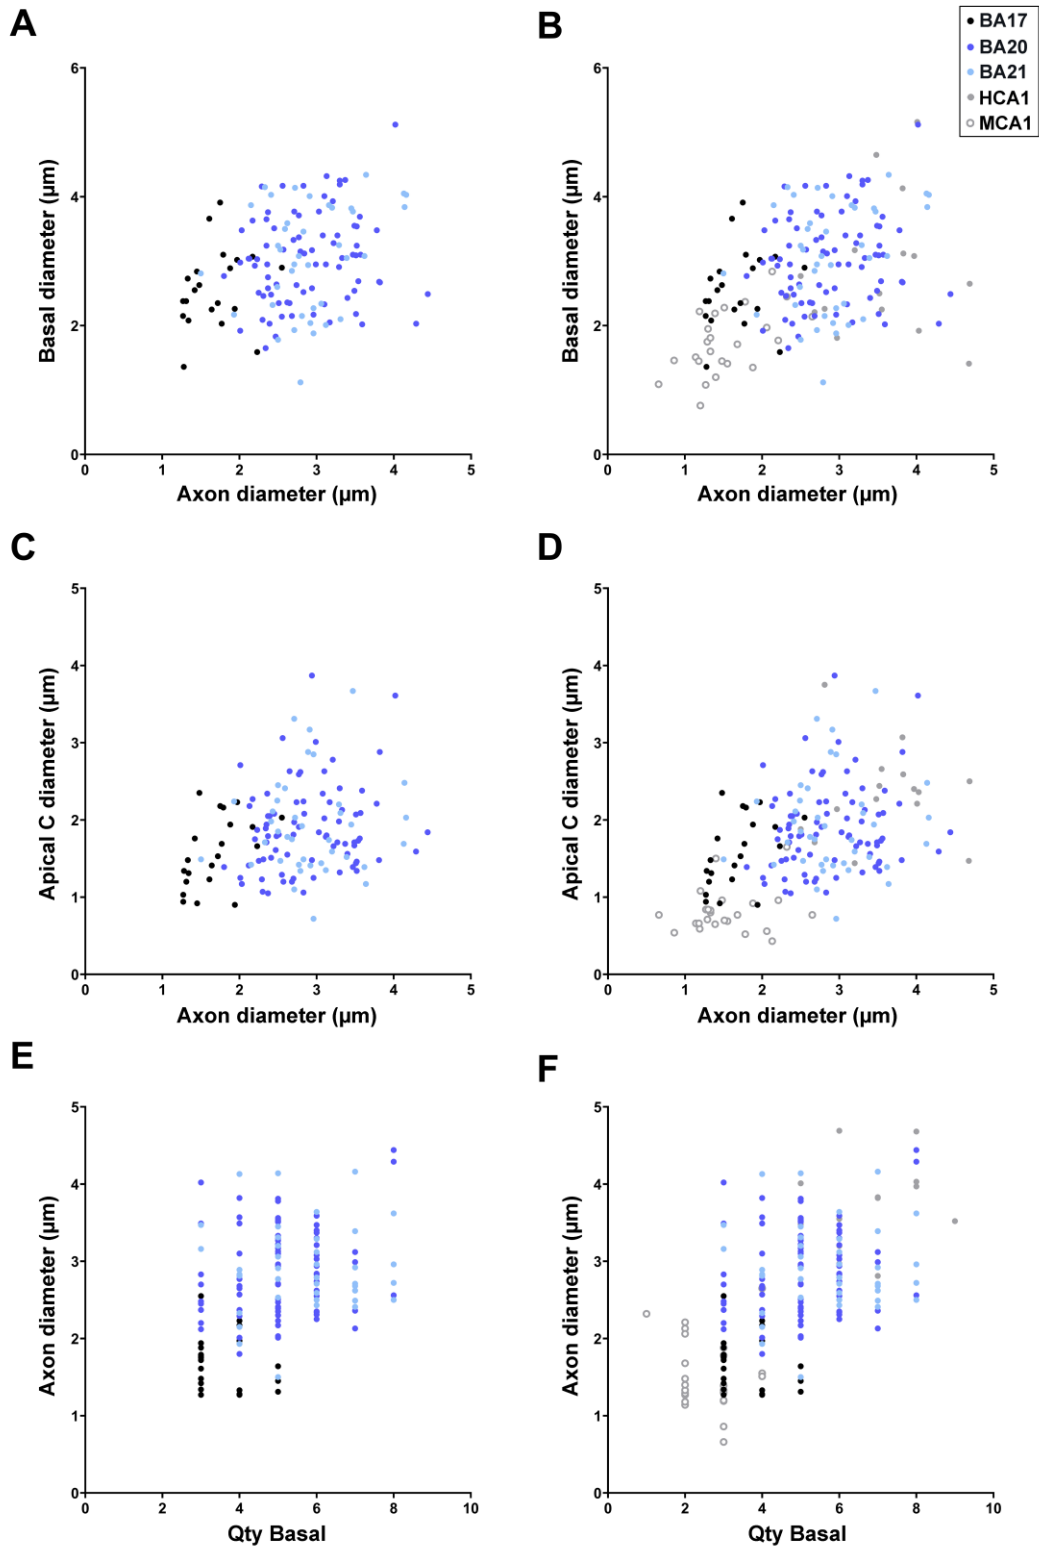

**Supplementary Figure 14.** Correlation analyses between various morphological parameters analyzed. Each point represents the values obtained in one cell from human BA17 (black), BA20 (dark blue), BA21 (light blue) cortical areas (A, C, E; left column). Additional correlations, including human CA1 (grey) and mouse CA1 (open circles) regions, are shown (B, D, F; right column). Qty Basal = n° primary basal dendrites. Significant correlations were classified as weak [Spearman's rho ( $r$ ) value lower than 0.40], moderate ( $0.4 < r < 0.7$ ), and strong ( $r > 0.7$ ). See also Supplementary Table 11.



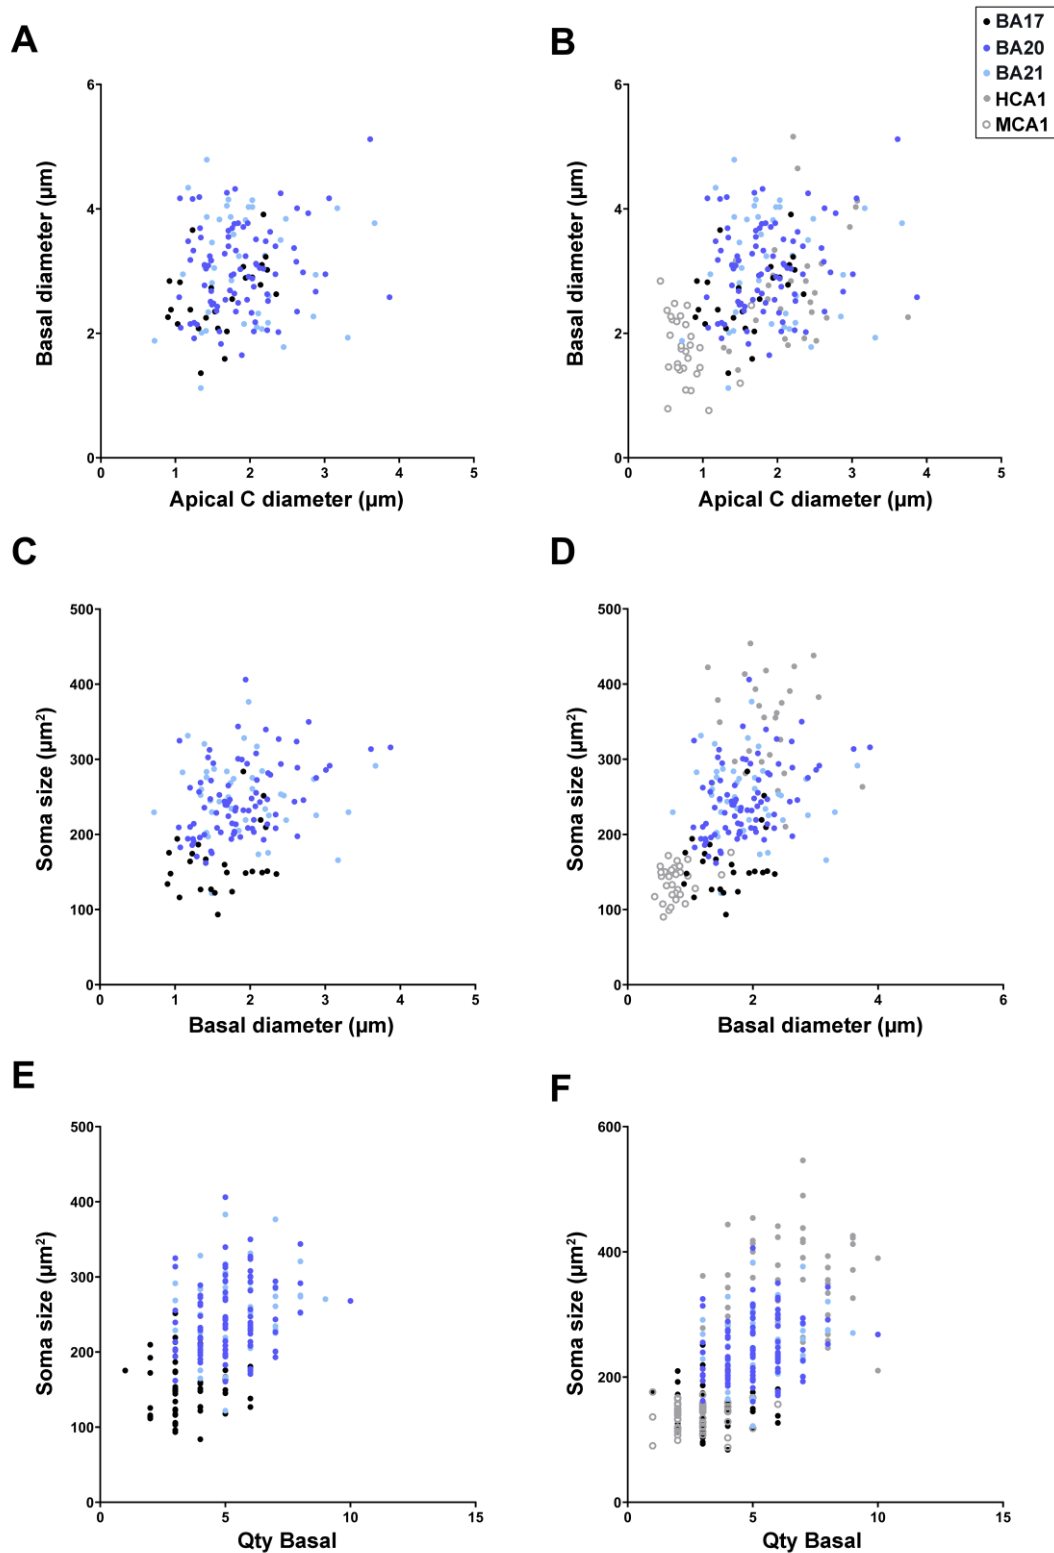

**Supplementary Figure 15.** Correlation analyses between various morphological parameters analyzed. Each point represents the values obtained in one cell from human BA17 (black), BA20 (dark blue), BA21 (light blue) cortical areas (A, C, E; left column). Additional correlations, including human CA1 (grey) and mouse CA1 (open circles) regions, are shown (B, D, F; right column). Qty Basal =  $n^\circ$  primary basal dendrites. Significant correlations were classified as weak [Spearman's rho ( $r$ ) value lower than 0.40], moderate ( $0.4 < r < 0.7$ ), and strong ( $r > 0.7$ ). See also Supplementary Table 11.

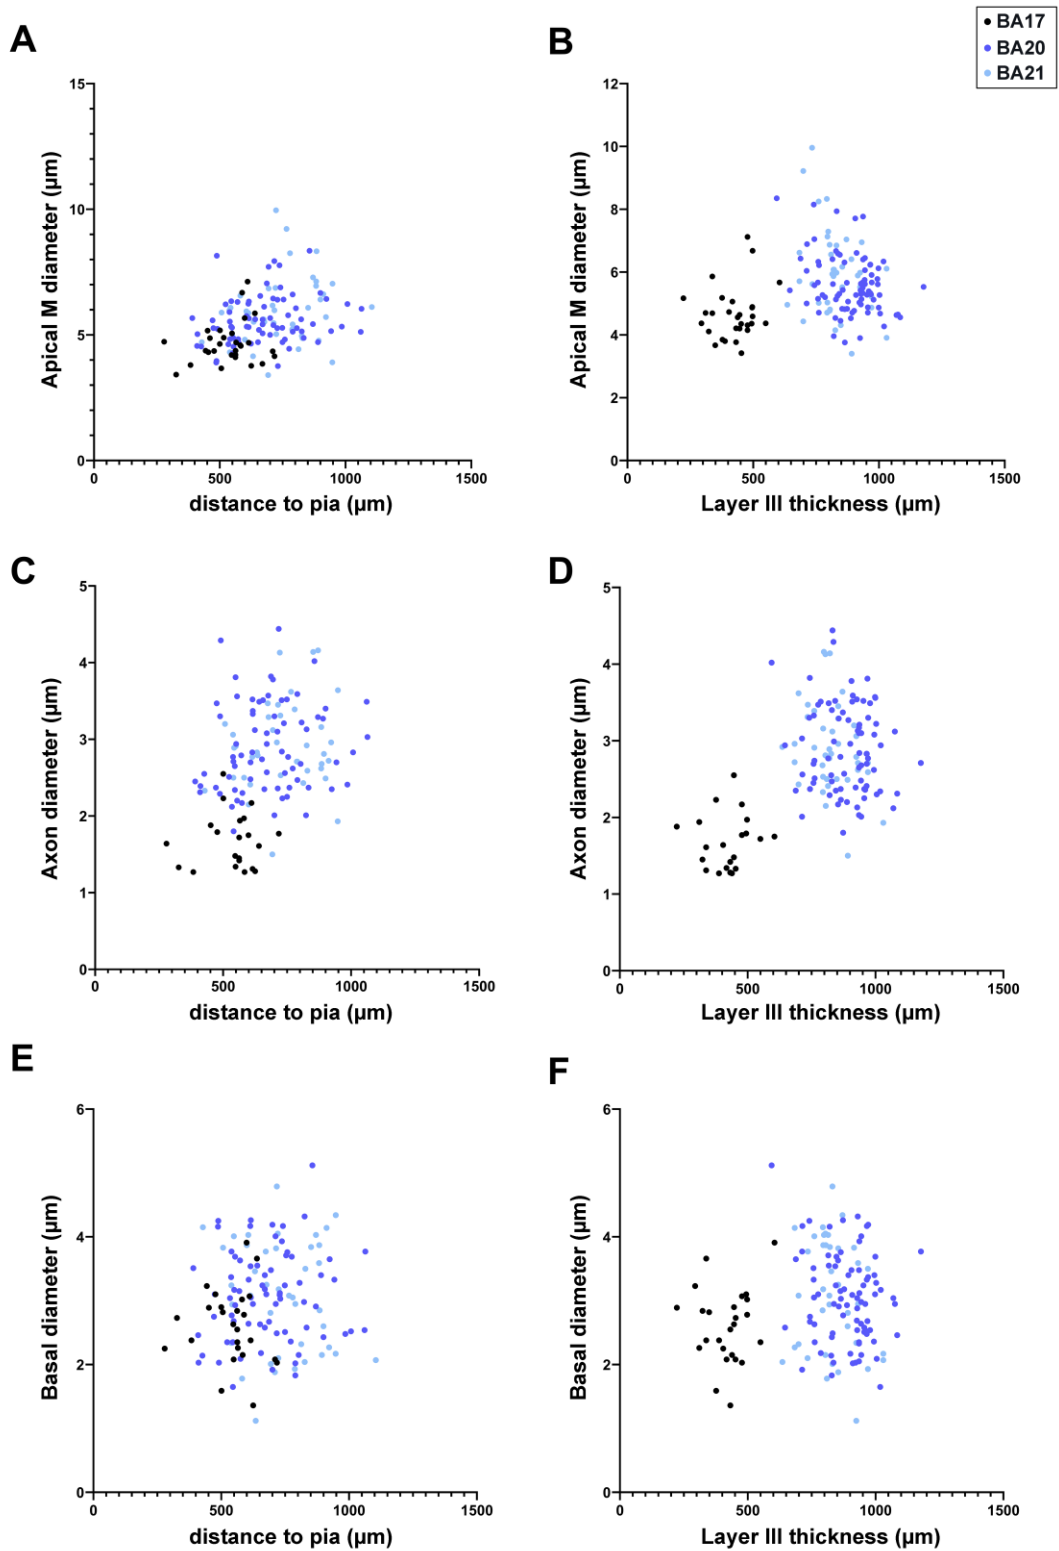

**Supplementary Figure 16.** Correlation analyses (A-F) between various morphological parameters analyzed. Each point represents the values obtained in one cell from human BA17 (black), BA20 (dark blue), BA21 (light blue) cortical areas and human CA1 (grey) and mouse CA1 (open circles) regions. Significant correlations were classified as weak [Spearman's rho ( $r$ ) value lower than 0.40], moderate ( $0.4 < r < 0.7$ ), and strong ( $r > 0.7$ ). See also Supplementary Table 11.

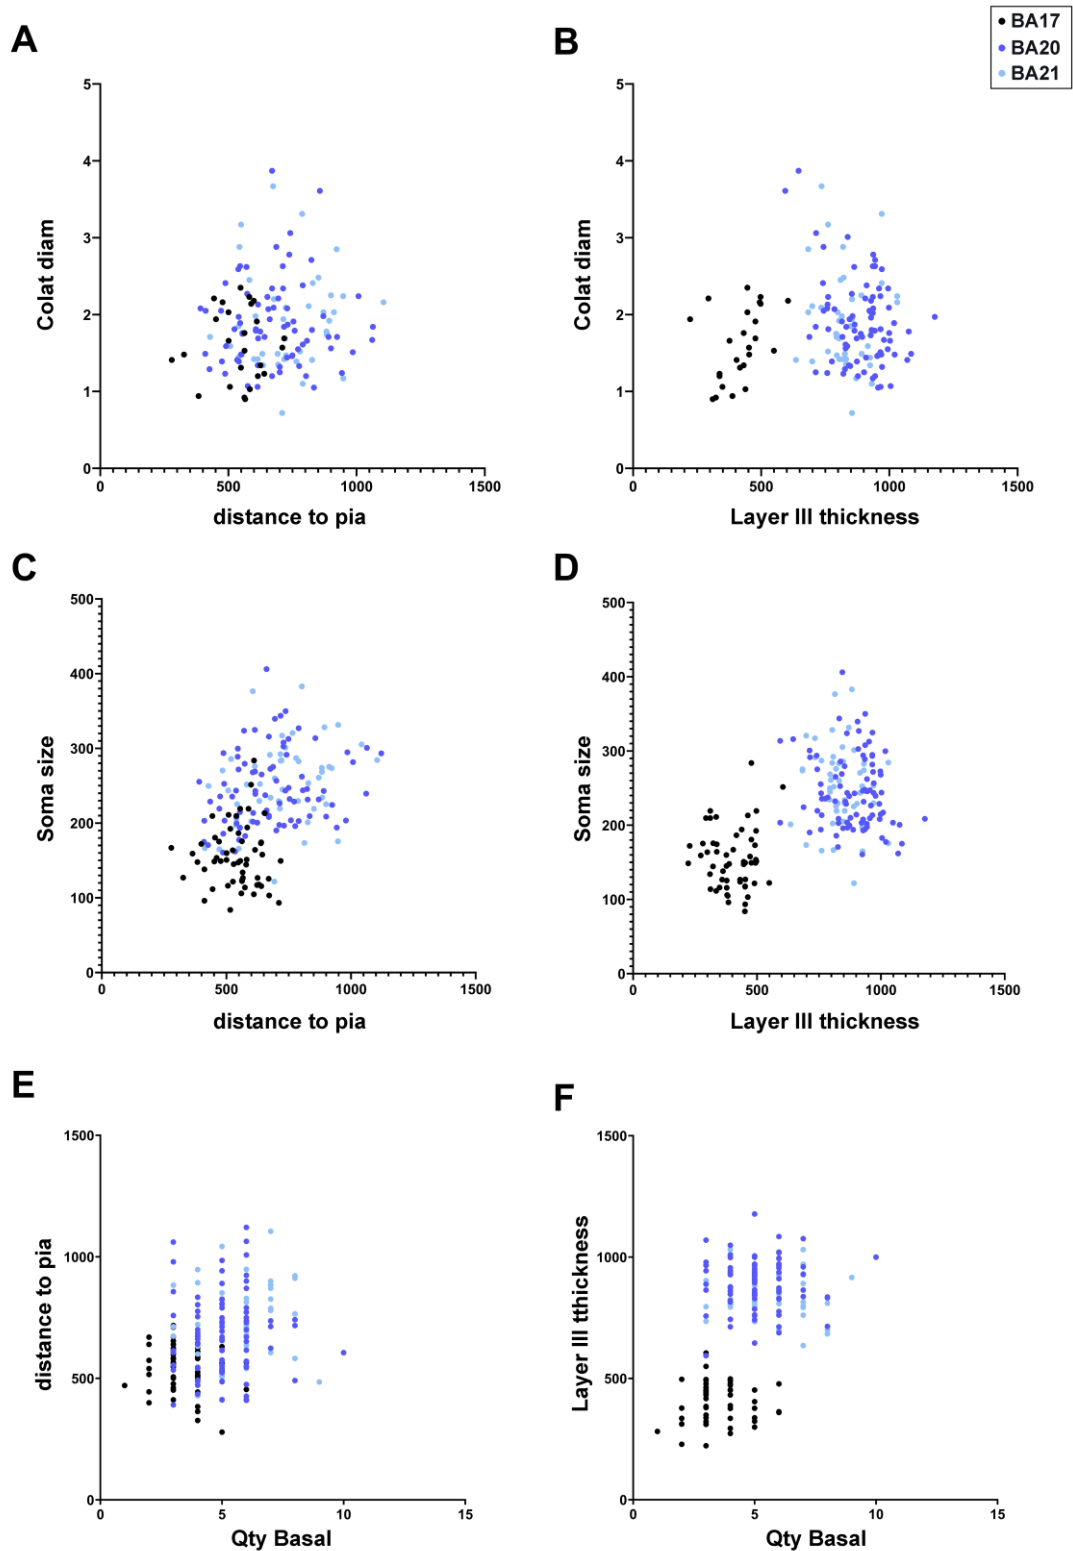

**Supplementary Figure 17.** Correlation analyses (A-F) between various morphological parameters analyzed. Each point represents the values obtained in one cell from human BA17 (black), BA20 (dark blue), BA21 (light blue) cortical areas and human CA1 (grey) and mouse CA1 (open circles) regions. Qty Basal = n° primary basal dendrites. Significant correlations were classified as weak [Spearman's rho (r) value lower than 0.40], moderate (0.4<r<0.7), and strong (r>0.7). See also Supplementary Table 11.

**Supplementary Table 1:** Statistical comparisons (Kruskal-Wallis test) of mean values of morphological variables per region shown in Figure 3 A, B (a) and Supplementary figure 1 (a, b).

**a.**

|                                             | BA17<br>vs<br>BA20 | BA17<br>vs<br>BA21 | BA20<br>vs<br>BA21 |
|---------------------------------------------|--------------------|--------------------|--------------------|
| Soma volume (Fig. 3A)                       | ****               | ****               | ns                 |
| Number of primary basal dendrites (Fig. 3B) | ****               | ****               | ns                 |
| Soma area(Supl. fig 1A)                     | ****               | ****               | ns                 |
| Soma surface area (Supl. fig 1B)            | ****               | ****               | ns                 |

**b.**

|              | Segment diameter   |                    |                    | Segment length     |                    |                    | Segment surface area |                    |                    | Segment volume     |                    |                    |
|--------------|--------------------|--------------------|--------------------|--------------------|--------------------|--------------------|----------------------|--------------------|--------------------|--------------------|--------------------|--------------------|
|              | BA17<br>vs<br>BA20 | BA17<br>vs<br>BA21 | BA20<br>vs<br>BA21 | BA17<br>vs<br>BA20 | BA17<br>vs<br>BA21 | BA20<br>vs<br>BA21 | BA17<br>vs<br>BA20   | BA17<br>vs<br>BA21 | BA20<br>vs<br>BA21 | BA17<br>vs<br>BA20 | BA17<br>vs<br>BA21 | BA20<br>vs<br>BA21 |
| Cell         | ns                 | ns                 | ns                 | ****               | ****               | ****               | ****                 | ****               | ***                | ****               | ****               | ***                |
| Apical (M+C) | ***                | ns                 | **                 | ****               | ****               | **                 | ****                 | ****               | ***                | ****               | ****               | ****               |
| Apical M     | ns                   | ns                 | ns                 | ns                 | ns                 | ns                 |
| Apical C     | *                  | ns                 | ns                 | ****               | ****               | *                  | ****                 | ****               | **                 | ****               | ****               | **                 |
| Basal        | ns                 | ns                 | **                 | ****               | ****               | *                  | ****                 | ****               | ns                 | ****               | ****               | ns                 |

**Supplementary Table 2:** Statistical comparisons of dendritic diameter values per distance from soma from Fig 3 C-F.

|                    | μm  | Apical M      |               |               | Apical C      |               |               | Basal         |               |               | Axon          |               |               |
|--------------------|-----|---------------|---------------|---------------|---------------|---------------|---------------|---------------|---------------|---------------|---------------|---------------|---------------|
|                    |     | BA17 vs. BA20 | BA17 vs. BA21 | BA20 vs. BA21 | BA17 vs. BA20 | BA17 vs. BA21 | BA20 vs. BA21 | BA17 vs. BA20 | BA17 vs. BA21 | BA20 vs. BA21 | BA17 vs. BA20 | BA17 vs. BA21 | BA20 vs. BA21 |
| Dendritic Diameter | 20  | ****          | ****          | ns            | ns            | ns            | ns            | ***           | ****          | ns            | ****          | ****          | ns            |
|                    | 30  | ****          | ****          | ns            | ns            | ns            | ns            | ***           | ****          | ns            | ****          | ****          | ns            |
|                    | 40  | ****          | ****          | ns            | ns            | ns            | ns            | **            | ****          | ns            | *             | **            | ns            |
|                    | 50  | ***           | **            | ns            | *             | ns            | ns            | ***           | ****          | ns            | ns            | ns            | ns            |
|                    | 60  | ***           | ***           | ns            | *             | *             | ns            | ***           | ***           | ns            | ns            | ns            | ns            |
|                    | 70  | ****          | ****          | ns            | ***           | **            | ns            | **            | ***           | ns            | ns            | ns            | ns            |
|                    | 80  | ****          | ****          | ns            | **            | **            | ns            | **            | **            | ns            | ns            | ns            | ns            |
|                    | 90  | ****          | ***           | ns            | ***           | *             | ns            | ***           | ***           | ns            | -             | -             | -             |
|                    | 100 | ****          | **            | ns            | **            | ns            | ns            | ****          | **            | ns            | -             | -             | -             |
|                    | 110 | ****          | ***           | ns            | *             | ns            | ns            | ****          | **            | ns            | -             | -             | -             |
|                    | 120 | ****          | ***           | ns            | ns            | ns            | ns            | ***           | **            | ns            | -             | -             | -             |
|                    | 130 | ****          | **            | ns            | ns            | ns            | ns            | *             | ns            | ns            | -             | -             | -             |
|                    | 140 | ****          | **            | ns            | ns            | ns            | ns            | **            | *             | ns            | -             | -             | -             |
|                    | 150 | ****          | **            | ns            | ns            | ns            | ns            | **            | ns            | ns            | -             | -             | -             |
|                    | 160 | ****          | **            | ns            | -             | -             | -             |
|                    | 170 | ****          | **            | ns            | ns            | ns            | ns            | -             | -             | -             | -             | -             | -             |
|                    | 180 | ****          | **            | ns            | ns            | ns            | ns            | -             | -             | -             | -             | -             | -             |
|                    | 190 | ***           | ns            | ns            | ns            | ns            | ns            | -             | -             | -             | -             | -             | -             |
|                    | 200 | **            | ns            | ns            | ns            | ns            | ns            | -             | -             | -             | -             | -             | -             |
|                    | 210 | ***           | ns            | *             | ns            | ns            | ns            | -             | -             | -             | -             | -             | -             |
| 220                | *** | ns            | ns            | ns            | ns            | ns            | -             | -             | -             | -             | -             | -             |               |
| 230                | *   | ns            | ns            | ns            | ns            | ns            | -             | -             | -             | -             | -             | -             |               |
| 240                | *   | ns            | ns            | ns            | ns            | ns            | -             | -             | -             | -             | -             | -             |               |
| 250                | ns  | ns            | ns            | ns            | ns            | ns            | -             | -             | -             | -             | -             | -             |               |
| 260                | ns  | ns            | ns            | ns            | ns            | ns            | -             | -             | -             | -             | -             | -             |               |
| 270                | ns  | ns            | ns            | ns            | ns            | ns            | -             | -             | -             | -             | -             | -             |               |

**Supplementary Table 3:** Statistical comparisons of segment diameter, length, surface area and volume values per branch order, between compartments (a) and orders (b) from graphs shown in Figure 4 and Supplementary Figure 5A.

a.

|          |         | Segment diameter |               |               | Segment length |               |               | Segment area  |               |               | Segment volume |               |               |
|----------|---------|------------------|---------------|---------------|----------------|---------------|---------------|---------------|---------------|---------------|----------------|---------------|---------------|
|          |         | BA17 vs. BA20    | BA17 vs. BA21 | BA20 vs. BA21 | BA17 vs. BA20  | BA17 vs. BA21 | BA20 vs. BA21 | BA17 vs. BA20 | BA17 vs. BA21 | BA20 vs. BA21 | BA17 vs. BA20  | BA17 vs. BA21 | BA20 vs. BA21 |
| Apical M | Order 1 | ****             | **            | ns            | ns             | ns            | ns            | ns            | ns            | ns            | ***            | *             | ns            |
|          | Order 2 | ****             | ***           | ns            | ns             | ns            | ns            | ns            | ns            | ns            | **             | ns            | *             |
|          | Order 3 | ***              | ns            | *             | *              | ns            | ns            | *             | ns            | ns            | **             | ns            | ns            |
|          | Order 4 | ns               | ns            | ns            | ns             | ns            | ns            | ns            | ns            | ns            | ns             | ns            | ns            |
| Apical C | Order 1 | **               | ns            | ns            | ****           | ****          | ns            | ****          | ****          | ns            | ****           | ****          | ns            |
|          | Order 2 | ns               | ns            | ns            | ****           | ****          | **            | ****          | ****          | **            | ****           | ****          | ***           |
|          | Order 3 | ns               | ns            | ns            | ****           | ****          | **            | ****          | ****          | **            | ****           | ****          | **            |
|          | Order 4 | ns               | ns            | ns            | ****           | *             | *             | ****          | *             | *             | ****           | *             | *             |
| Basal    | Order 1 | ****             | ****          | ns            | ****           | ****          | ns            | ****          | ****          | ns            | ****           | ****          | ns            |
|          | Order 2 | ns               | ns            | ns            | **             | ****          | *             | ****          | ****          | **            | ****           | ****          | **            |
|          | Order 3 | ns               | ns            | ns            | ****           | ****          | ns            | ****          | ****          | ns            | ****           | ****          | ns            |
|          | Order 4 | ns               | *             | ns            | ****           | ****          | ***           | ****          | ****          | **            | ****           | ****          | ns            |
|          | Order 5 | ns               | ns            | ns            | ****           | ****          | **            | ****          | ****          | *             | ****           | ****          | ns            |
|          | Order 6 | ns               | ns            | *             | ***            | ns            | ****          | ***           | *             | ***           | ***            | *             | *             |







b.

| Length                  |                  | Intermediate segment |               |                  |               |                  |               | Terminal segment |               |                  |               |                  |               |
|-------------------------|------------------|----------------------|---------------|------------------|---------------|------------------|---------------|------------------|---------------|------------------|---------------|------------------|---------------|
|                         |                  | Apical C<br>BA17     | Basal<br>BA17 | Apical C<br>BA20 | Basal<br>BA20 | Apical C<br>BA21 | Basal<br>BA21 | Apical C<br>BA17 | Basal<br>BA17 | Apical C<br>BA20 | Basal<br>BA20 | Apical C<br>BA21 | Basal<br>BA21 |
| Intermediate<br>segment | Apical C<br>BA17 |                      | *             | ****             | ns            | ****             | ns            | ****             | ****          | ****             | ****          | ****             | ****          |
|                         | Basal BA17       |                      |               | ****             | ****          | ****             | ****          | ****             | ****          | ****             | ****          | ****             | ****          |
|                         | Apical C<br>BA20 |                      |               |                  | ****          | ns               | ****          | ****             | ****          | ****             | ****          | ****             | ****          |
|                         | Basal BA20       |                      |               |                  |               | ****             | ns            | ****             | ****          | ****             | ****          | ****             | ****          |
|                         | Apical C<br>BA21 |                      |               |                  |               |                  | ****          | ****             | ****          | ****             | ****          | ****             | ****          |
|                         | Basal BA21       |                      |               |                  |               |                  |               | ****             | ****          | ****             | ****          | ****             | ****          |
| Terminal segment        | Apical C<br>BA17 |                      |               |                  |               |                  |               |                  | ns            | ****             | ****          | ****             | ****          |
|                         | Basal BA17       |                      |               |                  |               |                  |               |                  |               | ****             | ****          | ****             | ****          |
|                         | Apical C<br>BA20 |                      |               |                  |               |                  |               |                  |               |                  | ns            | ***              | **            |
|                         | Basal BA20       |                      |               |                  |               |                  |               |                  |               |                  |               | ****             | ****          |
|                         | Apical C<br>BA21 |                      |               |                  |               |                  |               |                  |               |                  |               |                  | ns            |
|                         | Basal BA21       |                      |               |                  |               |                  |               |                  |               |                  |               |                  |               |

c.





**Supplementary Table 5:** Statistical comparisons of segment diameters/length/surface area and volume values per branch order and dendritic segment type (intermediate/terminal), between compartments (a) and orders (b) from graphs shown in Figure 5, Supplementary Figure 5 D, E.

**a.**

|                       |         | Segment diameter |               |               | Segment length |               |               | Segment surface area |               |               | Segment volume |               |               |
|-----------------------|---------|------------------|---------------|---------------|----------------|---------------|---------------|----------------------|---------------|---------------|----------------|---------------|---------------|
|                       |         | BA17 vs. BA20    | BA17 vs. BA21 | BA20 vs. BA21 | BA17 vs. BA20  | BA17 vs. BA21 | BA20 vs. BA21 | BA17 vs. BA20        | BA17 vs. BA21 | BA20 vs. BA21 | BA17 vs. BA20  | BA17 vs. BA21 | BA20 vs. BA21 |
| Intermediate Apical C | Order 1 | ns               | ns            | ns            | ****           | ****          | ns            | ****                 | ****          | ns            | ns             | ns            | ns            |
|                       | Order 2 | ns               | ns            | ns            | ****           | ****          | ns            | ****                 | ****          | ns            | ns             | ns            | ns            |
|                       | Order 3 | ns               | ns            | ns            | ***            | ***           | ns            | ***                  | ***           | ns            | ns             | ns            | ns            |
|                       | Order 4 | ns               | *             | ns            | ns             | ns            | ns            | ns                   | ns            | ns            | ns             | *             | ns            |
| Intermediate basal    | Order 1 | ****             | ****          | ns            | ****           | ****          | ns            | ****                 | ****          | ns            | ****           | ****          | ns            |
|                       | Order 2 | ns               | ns            | ns            | ****           | ****          | *             | ****                 | ****          | **            | ns             | ns            | ns            |
|                       | Order 3 | ns               | ns            | ns            | ****           | ****          | ns            | ****                 | ****          | ns            | ns             | ns            | ns            |
|                       | Order 4 | ns               | ns            | ns            | ****           | ****          | ns            | ****                 | ****          | ns            | ns             | ns            | ns            |
|                       | Order 5 | ns               | ns            | ns            | *              | *             | ns            | *                    | *             | ns            | ns             | ns            | ns            |
| Terminal Apical C     | Order 1 | ns               | ns            | *             | ****           | ****          | ****          | ****                 | ****          | ***           | ****           | ****          | *             |
|                       | Order 2 | ns               | ns            | ns            | ****           | ****          | ****          | ****                 | ****          | ****          | ****           | ****          | ****          |
|                       | Order 3 | ns               | ns            | ns            | ****           | ****          | ***           | ****                 | ****          | ***           | ****           | ****          | ***           |
|                       | Order 4 | ns               | *             | ns            | ****           | **            | *             | ****                 | ***           | *             | ****           | ***           | *             |
| Terminal Basal        | Order 2 | ns               | ns            | ns            | ****           | ns            | **            | ****                 | *             | ns            | ****           | **            | ns            |
|                       | Order 3 | ns               | *             | ns            | ****           | ****          | **            | ****                 | ****          | *             | ****           | ****          | ns            |
|                       | Order 4 | ns               | **            | ns            | ****           | ****          | ****          | ****                 | ****          | ****          | ****           | ****          | ***           |
|                       | Order 5 | ns               | ns            | ns            | ****           | ****          | ****          | ****                 | ****          | ****          | ****           | ****          | ***           |
|                       | Order 6 | ns               | ns            | ns            | ***            | ns            | ****          | ***                  | *             | ***           | ***            | *             | *             |





**Supplementary Table 6:** Statistical comparisons (Kruskal-Wallis test) of mean values of morphological variables per region shown in Figure 7 A, B (a) and Supplementary figures 6 and 10 A, B (a, b).

**a.**

|                                             | BA17<br>vs<br>BA20 | BA17<br>vs<br>BA21 | BA17<br>vs<br>HCA1 | BA17<br>vs<br>MCA1 | BA20<br>vs<br>BA21 | BA20<br>vs<br>HCA1 | BA20<br>vs<br>MCA1 | BA21<br>vs<br>HCA1 | BA21<br>vs<br>MCA1 | HCA1<br>vs<br>MCA1 |
|---------------------------------------------|--------------------|--------------------|--------------------|--------------------|--------------------|--------------------|--------------------|--------------------|--------------------|--------------------|
| Soma volume (Fig. 7A)                       | ****               | ****               | ****               | ns                 | ns                 | ***                | ****               | *                  | ****               | ****               |
| Number of primary basal dendrites (Fig. 7B) | ****               | ****               | ****               | ns                 | ns                 | *                  | ****               | ns                 | ****               | ****               |
| Soma area (Supl. Fig. 6A)                   | ****               | ****               | ****               | ns                 | ns                 | ****               | ****               | ***                | ****               | ****               |
| Soma surface area (Supl. Fig. 6B)           | ****               | ****               | ****               | ns                 | ns                 | ****               | ****               | *                  | ****               | ****               |
| Cell area (Convex 2D) (Supl. Fig. 10A)      | ****               | ****               | ****               | ns                 | ns                 | ns                 | ****               | ns                 | ****               | ****               |
| Cell volume (Convex 3D) (Supl. Fig. 10B)    | ****               | ****               | ****               | ns                 | ns                 | ns                 | ****               | ns                 | ****               | ****               |

**b.**

| Segment<br>diameter | BA17<br>vs<br>BA20 | BA17<br>vs<br>BA21 | BA17<br>vs<br>HCA1 | BA17<br>vs<br>MCA1 | BA20<br>vs<br>BA21 | BA20<br>vs<br>HCA1 | BA20<br>vs<br>MCA1 | BA21<br>vs<br>HCA1 | BA21<br>vs<br>MCA1 | HCA1<br>vs<br>MCA1 |
|---------------------|--------------------|--------------------|--------------------|--------------------|--------------------|--------------------|--------------------|--------------------|--------------------|--------------------|
| Cell                | ns                 | ns                 | ****               | ****               | ns                 | ****               | ****               | ****               | ****               | ****               |
| Apical (M+C)        | *                  | ns                 | ****               | ****               | ns                 | ****               | ****               | ****               | ****               | ****               |
| Apical M            | ns                 | ns                 | ****               | ns                 | ns                 | ****               | ****               | ****               | ***                | ****               |
| Apical C            | ns                 | ns                 | ****               | ****               | ns                 | ****               | ****               | ****               | ****               | ****               |
| Basal               | ns                 | ns                 | ****               | ****               | *                  | ****               | ****               | ****               | ****               | ****               |

| Segment length | BA17 vs BA20 | BA17 vs BA21 | BA17 vs HCA1 | BA17 vs MCA1 | BA20 vs BA21 | BA20 vs HCA1 | BA20 vs MCA1 | BA21 vs HCA1 | BA21 vs MCA1 | HCA1 vs MCA1 |
|----------------|--------------|--------------|--------------|--------------|--------------|--------------|--------------|--------------|--------------|--------------|
| Cell           | ****         | ****         | ****         | ****         | ****         | ns           | ****         | **           | **           | ****         |
| Apical (M+C)   | ****         | ****         | ****         | ****         | **           | **           | ****         | ns           | ****         | ****         |
| Apical M       | ns           |
| Apical C       | ****         | ****         | ****         | ****         | *            | *            | ****         | ns           | ****         | ****         |
| Basal          | ****         | ****         | ****         | ****         | ns           | ns           | ****         | ns           | ****         | ****         |

| Segment surface area | BA17 vs BA20 | BA17 vs BA21 | BA17 vs HCA1 | BA17 vs MCA1 | BA20 vs BA21 | BA20 vs HCA1 | BA20 vs MCA1 | BA21 vs HCA1 | BA21 vs MCA1 | HCA1 vs MCA1 |
|----------------------|--------------|--------------|--------------|--------------|--------------|--------------|--------------|--------------|--------------|--------------|
| Cell                 | ****         | ****         | ****         | **           | ***          | **           | ****         | ****         | ****         | ****         |
| Apical (M+C)         | ****         | ****         | ****         | ns           | ***          | ns           | ****         | ***          | ****         | ****         |
| Apical M             | ns           | ns           | ****         | ns           | ns           | ****         | **           | ****         | ns           | ****         |
| Apical C             | ****         | ****         | ****         | ns           | *            | ns           | ****         | *            | ****         | ****         |
| Basal                | ****         | ****         | ****         | ns           | ns           | ns           | ****         | ***          | ****         | ****         |

| Segment volume | BA17 vs BA20 | BA17 vs BA21 | BA17 vs HCA1 | BA17 vs MCA1 | BA20 vs BA21 | BA20 vs HCA1 | BA20 vs MCA1 | BA21 vs HCA1 | BA21 vs MCA1 | HCA1 vs MCA1 |
|----------------|--------------|--------------|--------------|--------------|--------------|--------------|--------------|--------------|--------------|--------------|
| Cell           | ****         | ****         | ****         | ****         | *            | ****         | ****         | ****         | ****         | ****         |
| Apical (M+C)   | ****         | ****         | ****         | ****         | ***          | ***          | ****         | ****         | ****         | ****         |
| Apical M       | ns           | ns           | ****         | ns           | ns           | ****         | ****         | ****         | *            | ****         |
| Apical C       | ****         | ****         | ****         | ****         | ns           | ***          | ****         | ****         | ****         | ****         |
| Basal          | ****         | ****         | ****         | ****         | ns           | ****         | ****         | ****         | ****         | ****         |



**Supplementary Table 7:** Statistical comparisons of dendritic diameter values per distance from soma between regions in the apical M (a), apical C (b), basal (c) and axonal (d) compartments from graphs shown in Figure 7 C- F.

a.

| $\mu\text{m}$ | Apical M dendritic diameter |              |              |              |              |              |              |              |              |              |
|---------------|-----------------------------|--------------|--------------|--------------|--------------|--------------|--------------|--------------|--------------|--------------|
|               | BA17 vs BA20                | BA17 vs BA21 | BA17 vs HCA1 | BA17 vs MCA1 | BA20 vs BA21 | BA20 vs HCA1 | BA20 vs MCA1 | BA21 vs HCA1 | BA21 vs MCA1 | HCA1 vs MCA1 |
| 20            | -                           | -            | -            | -            | -            | -            | -            | -            | -            | -            |
| 30            | ****                        | ***          | ****         | ****         | ns           | ****         | ****         | ****         | ****         | ****         |
| 40            | ****                        | ***          | ****         | ***          | ns           | ****         | ****         | ****         | ****         | ****         |
| 50            | ***                         | **           | ****         | *            | ns           | ****         | ****         | ****         | ****         | ****         |
| 60            | ***                         | **           | ****         | ns           | ns           | ****         | ****         | ****         | ****         | ****         |
| 70            | ****                        | ****         | ****         | ns           | ns           | ****         | ****         | ****         | ****         | ****         |
| 80            | ****                        | ***          | ****         | ns           | ns           | ****         | ****         | ****         | ****         | ****         |
| 90            | ****                        | **           | ****         | ns           | ns           | ****         | ****         | ****         | ***          | ****         |
| 100           | ****                        | **           | ****         | ns           | ns           | ****         | ****         | ****         | ***          | ****         |
| 110           | ****                        | **           | ****         | ns           | ns           | ****         | ****         | ****         | **           | ****         |
| 120           | ****                        | ***          | ****         | ns           | ns           | ****         | ****         | ****         | *            | ****         |
| 130           | ****                        | *            | ****         | ns           | ns           | ****         | ****         | ****         | ns           | ****         |
| 140           | ****                        | *            | ****         | ns           | ns           | ****         | ****         | ****         | ns           | ****         |
| 150           | ****                        | **           | ****         | *            | ns           | ****         | **           | ****         | ns           | ****         |
| 160           | ****                        | *            | ****         | *            | ns           | ****         | **           | ****         | ns           | ****         |
| 170           | ****                        | **           | ****         | **           | ns           | ****         | *            | ****         | ns           | ****         |
| 180           | ****                        | *            | ****         | **           | ns           | ****         | *            | ****         | ns           | ****         |
| 190           | **                          | ns           | ****         | ns           | ns           | ****         | ns           | ****         | ns           | ****         |
| 200           | **                          | ns           | ****         | ns           | ns           | ****         | ns           | ****         | ns           | ****         |
| 210           | ***                         | ns           | ****         | ns           | ns           | ****         | ns           | ****         | ns           | ****         |
| 220           | ***                         | ns           | ****         | *            | ns           | ****         | ns           | ****         | ns           | ****         |
| 230           | *                           | ns           | ****         | ns           | ns           | ****         | ns           | ****         | ns           | ****         |
| 240           | ns                          | ns           | ****         | ns           | ns           | ****         | ns           | ****         | ns           | ****         |
| 250           | ns                          | ns           | ****         | ns           | ns           | ****         | *            | ****         | ns           | ****         |
| 260           | ns                          | ns           | ****         | ns           | ns           | ****         | *            | ****         | ns           | ****         |
| 270           | ns                          | ns           | ****         | ns           | ns           | ****         | **           | ****         | ns           | ****         |

b.

| μm  | Apical C dendritic diameter |                    |                    |                    |                    |                    |                    |                    |                    |                    |
|-----|-----------------------------|--------------------|--------------------|--------------------|--------------------|--------------------|--------------------|--------------------|--------------------|--------------------|
|     | BA17<br>vs<br>BA20          | BA17<br>vs<br>BA21 | BA17<br>vs<br>HCA1 | BA17<br>vs<br>MCA1 | BA20<br>vs<br>BA21 | BA20<br>vs<br>HCA1 | BA20<br>vs<br>MCA1 | BA21<br>vs<br>HCA1 | BA21<br>vs<br>MCA1 | HCA1<br>vs<br>MCA1 |
| 20  | ns                          | ns                 | ns                 | **                 | ns                 | ns                 | ****               | ns                 | **                 | *                  |
| 30  | ns                          | ns                 | ns                 | ****               | ns                 | ns                 | ****               | ns                 | ****               | ***                |
| 40  | ns                          | ns                 | ns                 | ****               | ns                 | ns                 | ****               | ns                 | ****               | ****               |
| 50  | *                           | ns                 | **                 | ****               | ns                 | ns                 | ****               | ns                 | ****               | ****               |
| 60  | ns                          | ns                 | **                 | ****               | ns                 | ns                 | ****               | ns                 | ****               | ****               |
| 70  | ***                         | **                 | ****               | ****               | ns                 | ns                 | ****               | ns                 | ****               | ****               |
| 80  | **                          | *                  | ****               | ****               | ns                 | ***                | ****               | ns                 | ****               | ****               |
| 90  | **                          | ns                 | ****               | ****               | ns                 | ****               | ****               | **                 | ****               | ****               |
| 100 | **                          | ns                 | ****               | ****               | ns                 | ****               | ****               | ****               | ****               | ****               |
| 110 | ns                          | ns                 | ****               | ****               | ns                 | ****               | ****               | ****               | ****               | ****               |
| 120 | ns                          | ns                 | ****               | ****               | ns                 | ****               | ****               | ****               | ****               | ****               |
| 130 | ns                          | ns                 | ****               | ****               | ns                 | ****               | ****               | ****               | ****               | ****               |
| 140 | ns                          | ns                 | ****               | ****               | ns                 | ****               | ****               | ****               | ****               | ****               |
| 150 | ns                          | ns                 | ****               | ****               | ns                 | ****               | ****               | ****               | ****               | ****               |
| 160 | ns                          | ns                 | ****               | **                 | ns                 | ****               | ****               | ****               | ****               | ****               |
| 170 | ns                          | ns                 | ****               | ****               | ns                 | ****               | ****               | ****               | ****               | ****               |
| 180 | ns                          | ns                 | ****               | ****               | ns                 | ****               | ****               | ****               | ****               | ****               |
| 190 | ns                          | ns                 | ***                | ***                | ns                 | ****               | ****               | ****               | ****               | ****               |
| 200 | ns                          | ns                 | ***                | ****               | ns                 | ****               | ****               | ****               | ****               | ****               |
| 210 | ns                          | ns                 | *                  | ****               | ns                 | ***                | ****               | ****               | ****               | ****               |
| 220 | ns                          | ns                 | ns                 | ****               | ns                 | **                 | ****               | ****               | ****               | ****               |
| 230 | ns                          | ns                 | ns                 | **                 | ns                 | ***                | ****               | ****               | ****               | ****               |
| 240 | ns                          | ns                 | *                  | *                  | ns                 | **                 | ****               | ****               | ****               | ****               |
| 250 | ns                          | ns                 | ns                 | ns                 | ns                 | ****               | ****               | ****               | ***                | ****               |
| 260 | ns                          | ns                 | ns                 | ns                 | ns                 | ****               | ****               | ****               | ****               | ****               |
| 270 | ns                          | ns                 | ns                 | ns                 | ns                 | ***                | **                 | ***                | **                 | ****               |

C.

| μm  | Basal dendritic diameter |                    |                    |                    |                    |                    |                    |                    |                    |                    |
|-----|--------------------------|--------------------|--------------------|--------------------|--------------------|--------------------|--------------------|--------------------|--------------------|--------------------|
|     | BA17<br>vs<br>BA20       | BA17<br>vs<br>BA21 | BA17<br>vs<br>HCA1 | BA17<br>vs<br>MCA1 | BA20<br>vs<br>BA21 | BA20<br>vs<br>HCA1 | BA20<br>vs<br>MCA1 | BA21<br>vs<br>HCA1 | BA21<br>vs<br>MCA1 | HCA1<br>vs<br>MCA1 |
| 20  | **                       | ****               | **                 | ****               | ns                 | ns                 | ****               | ns                 | ****               | ****               |
| 30  | ***                      | ****               | ****               | ****               | ns                 | ns                 | ****               | ns                 | ****               | ****               |
| 40  | **                       | ****               | ****               | ****               | ns                 | ns                 | ****               | ns                 | ****               | ****               |
| 50  | **                       | ****               | ****               | ****               | ns                 | ns                 | ****               | ns                 | ****               | ****               |
| 60  | **                       | ***                | ****               | ****               | ns                 | ns                 | ****               | ns                 | ****               | ****               |
| 70  | *                        | **                 | ****               | ****               | ns                 | ***                | ****               | ns                 | ****               | ****               |
| 80  | **                       | *                  | ****               | ****               | ns                 | ****               | ****               | ***                | ****               | ****               |
| 90  | ***                      | **                 | ****               | ****               | ns                 | ****               | ****               | ****               | ****               | ****               |
| 100 | ***                      | *                  | ****               | ****               | ns                 | ***                | ****               | ****               | ****               | ****               |
| 110 | ***                      | *                  | ****               | ****               | ns                 | ***                | ****               | ****               | ****               | ****               |
| 120 | **                       | **                 | ****               | ****               | ns                 | ****               | ****               | ****               | ****               | ****               |
| 130 | *                        | ns                 | ****               | ****               | ns                 | ****               | ****               | ****               | ****               | ****               |
| 140 | *                        | ns                 | ****               | ****               | ns                 | ***                | ****               | ****               | ****               | ****               |
| 150 | *                        | ns                 | ****               | ****               | ns                 | **                 | ****               | ****               | ****               | ****               |
| 160 | ns                       | ns                 | ****               | ****               | ns                 | ***                | ****               | ****               | ****               | ****               |

d.

| μm | Axon diameter      |                    |                    |                    |                    |                    |                    |                    |                    |                    |
|----|--------------------|--------------------|--------------------|--------------------|--------------------|--------------------|--------------------|--------------------|--------------------|--------------------|
|    | BA17<br>vs<br>BA20 | BA17<br>vs<br>BA21 | BA17<br>vs<br>HCA1 | BA17<br>vs<br>MCA1 | BA20<br>vs<br>BA21 | BA20<br>vs<br>HCA1 | BA20<br>vs<br>MCA1 | BA21<br>vs<br>HCA1 | BA21<br>vs<br>MCA1 | HCA1<br>vs<br>MCA1 |
| 20 | ****               | ****               | ****               | *                  | ns                 | ***                | ****               | **                 | ****               | ****               |
| 30 | ****               | ****               | ****               | ns                 | ns                 | ****               | ****               | ****               | ****               | ****               |
| 40 | *                  | *                  | ****               | ns                 | ns                 | ****               | ****               | ****               | ****               | ****               |
| 50 | ns                 | ns                 | ***                | ns                 | ns                 | ****               | ****               | ****               | ****               | ****               |
| 60 | ns                 | ns                 | ****               | ns                 | ns                 | ****               | ****               | ****               | **                 | ****               |
| 70 | ns                 | ns                 | ns                 | ns                 | ns                 | ****               | ****               | ****               | ****               | ****               |
| 80 | ns                 | ns                 | ns                 | ns                 | ns                 | ***                | ****               | **                 | ****               | ****               |

**Supplementary Table 8:** Statistical comparisons of segment diameter/length/surface area and volume values per branch order in the different dendritic compartments, from graphs shown in Figure 8 A, B and Supplementary Figure 7.

|          |    | Segment diameter |              |              |              |              |              |              |              |              |              | Segment length |              |              |              |              |              |              |              |              |              |
|----------|----|------------------|--------------|--------------|--------------|--------------|--------------|--------------|--------------|--------------|--------------|----------------|--------------|--------------|--------------|--------------|--------------|--------------|--------------|--------------|--------------|
|          |    | BA17 vs BA20     | BA17 vs BA21 | BA17 vs HCA1 | BA17 vs MCA1 | BA20 vs BA21 | BA20 vs HCA1 | BA20 vs MCA1 | BA21 vs HCA1 | BA21 vs MCA1 | HCA1 vs MCA1 | BA17 vs BA20   | BA17 vs BA21 | BA17 vs HCA1 | BA17 vs MCA1 | BA20 vs BA21 | BA20 vs HCA1 | BA20 vs MCA1 | BA21 vs HCA1 | BA21 vs MCA1 | HCA1 vs MCA1 |
| Apical M | O1 | **               | *            | ****         | ns           | ns           | ****         | ****         | ****         | **           | ****         | ns             | ns           | ***          | ns           | ns           | ****         | ns           | *            | ****         | ns           |
|          | O2 | ***              | *            | ****         | ns           | ns           | ****         | ns           | ****         | ns           | ****         | ns             | ns           | ns           | ns           | ns           | ns           | ns           | ns           | ns           | *            |
|          | O3 | **               | ns           | ****         | ns           | ns           | ****         | *            | ****         | ns           | ****         | ns             | ns           | ***          | ns           | ns           | *            | ns           | *            | ns           | ns           |
| Apical C | O1 | ns               | ns           | ****         | ****         | ns           | ****         | ****         | ****         | ****         | ****         | ****           | ****         | ****         | ****         | ns           | ns           | ****         | ns           | *            | ***          |
|          | O2 | ns               | ns           | ****         | ****         | ns           | ****         | ****         | ****         | ****         | ****         | ****           | ****         | ****         | ***          | **           | ns           | ****         | *            | ns           | ****         |
|          | O3 | ns               | ns           | ****         | ****         | ns           | ****         | ****         | ****         | ****         | ****         | ****           | ****         | ****         | ns           | **           | ns           | ****         | ns           | ****         | ****         |
|          | O4 | ns               | ns           | ***          | ***          | ns           | ****         | ****         | **           | ****         | ****         | ****           | ns           | ***          | ns           | ns           | ns           | ****         | ns           | **           | ****         |
| Basal    | O1 | ****             | ***          | ns           | ****         | ns           | ***          | ****         | **           | ****         | ****         | ****           | ****         | **           | ns           | ns           | ns           | ****         | ns           | ****         | ****         |
|          | O2 | ns               | ns           | ns           | ****         | ns           | **           | ****         | *            | ****         | ****         | *              | ****         | ****         | **           | ns           | ****         | ns           | ns           | ns           | ns           |
|          | O3 | ns               | ns           | **           | ****         | ns           | ns           | ****         | ns           | ****         | ****         | ****           | ****         | ****         | ns           | ns           | ****         | **           | ***          | **           | ****         |
|          | O4 | ns               | ns           | ****         | ****         | ns           | ****         | ****         | ****         | ****         | ****         | ****           | ****         | ****         | ns           | **           | **           | ****         | ****         | ***          | ****         |
|          | O5 | ns               | ns           | ****         | ****         | ns           | ****         | ****         | ****         | ****         | ****         | ****           | ****         | ****         | ns           | *            | ns           | ****         | ns           | ****         | ****         |
|          | O6 | ns               | ns           | **           | ns           | ns           | ****         | ****         | **           | ****         | ****         | ***            | ns           | *            | ns           | ****         | ns           | ****         | ns           | ***          | ****         |

|          |    | Segment area       |                    |                    |                    |                    |                    |                    |                    |                    |                    | Segment volume     |                    |                    |                    |                    |                    |                    |                    |                    |                    |
|----------|----|--------------------|--------------------|--------------------|--------------------|--------------------|--------------------|--------------------|--------------------|--------------------|--------------------|--------------------|--------------------|--------------------|--------------------|--------------------|--------------------|--------------------|--------------------|--------------------|--------------------|
|          |    | BA17<br>vs<br>BA20 | BA17<br>vs<br>BA21 | BA17<br>vs<br>HCA1 | BA17<br>vs<br>MCA1 | BA20<br>vs<br>BA21 | BA20<br>vs<br>HCA1 | BA20<br>vs<br>MCA1 | BA21<br>vs<br>HCA1 | BA21<br>vs<br>MCA1 | HCA1<br>vs<br>MCA1 | BA17<br>vs<br>BA20 | BA17<br>vs<br>BA21 | BA17<br>vs<br>HCA1 | BA17<br>vs<br>MCA1 | BA20<br>vs<br>BA21 | BA20<br>vs<br>HCA1 | BA20<br>vs<br>MCA1 | BA21<br>vs<br>HCA1 | BA21<br>vs<br>MCA1 | HCA1<br>vs<br>MCA1 |
| Apical M | O1 | ns                 | *                  | *                  | ns                 | ****               | ns                 | ns                 | ****               | ****               | ****               | **                 | ****               |
|          | O2 | ns                 | ns                 | ****               | ns                 | ns                 | ****               | ns                 | ****               | ns                 | ns                 | ns                 | ns                 | ****               | ns                 | ns                 | ****               | ns                 | ****               | ns                 | ***                |
|          | O3 | ns                 | ns                 | ****               | ns                 | ns                 | ****               | ns                 | ****               | ns                 | ns                 | *                  | ns                 | ****               | ns                 | ns                 | ****               | ns                 | ****               | ns                 | *                  |
| Apical C | O1 | ****               | ****               | ****               | ****               | ns                 | *                  | ns                 | ns                 | ns                 | ****               | ****               | ****               | ****               | ns                 | ns                 | ****               | ****               | ***                | ****               | ****               |
|          | O2 | ****               | ****               | ****               | ns                 | **                 | ns                 | ****               | ***                | ****               | ****               | ****               | ****               | ****               | ns                 | *                  | ns                 | ****               | ****               | ****               | ****               |
|          | O3 | ****               | ****               | ****               | ns                 | **                 | ns                 | ****               | **                 | ****               | ****               | ****               | ****               | ****               | ns                 | *                  | ns                 | ****               | ****               | ****               | ****               |
|          | O4 | ***                | ns                 | ****               | ns                 | ns                 | ns                 | ****               | *                  | ***                | ****               | ***                | ns                 | ****               | ns                 | ns                 | ns                 | ****               | ***                | ****               | ****               |
| Basal    | O1 | ****               | ****               | ****               | ****               | ns                 | *                  | ****               | *                  | ****               | ****               | ****               | ****               | ****               | ****               | ns                 | ***                | ****               | **                 | ****               | ****               |
|          | O2 | ***                | ****               | ****               | ns                 | *                  | ****               | ****               | ns                 | ****               | ****               | ****               | ****               | ****               | ****               | *                  | ***                | ****               | ns                 | ****               | ****               |
|          | O3 | ****               | ****               | ****               | ns                 | ns                 | ****               | ****               | ****               | ****               | ****               | ****               | ****               | ****               | ***                | ns                 | ****               | ****               | ****               | ****               | ****               |
|          | O4 | ****               | ****               | ****               | ns                 | *                  | ****               | ****               | ****               | ****               | ****               | ****               | ****               | ****               | ns                 | ns                 | ****               | ****               | ****               | ****               | ****               |
|          | O5 | ****               | ****               | ****               | ns                 | ns                 | ns                 | ****               | ns                 | ****               | ****               | ****               | ****               | ****               | ns                 | ns                 | *                  | ****               | ***                | ****               | ****               |
|          | O6 | ***                | ns                 | ***                | ns                 | **                 | ns                 | ****               | *                  | ****               | ****               | **                 | ns                 | ****               | ns                 | ns                 | ns                 | ****               | **                 | ****               | ****               |

**Supplementary Table 9:** Statistical comparisons of segment diameters and length values per branch order and dendritic segment type (intermediate/terminal), from graphs shown in Figure 8 C-D.

|                      |    | Terminal segment diameter |                    |                    |                    |                    |                    |                    |                    |                    |                    | Terminal segment length |                    |                    |                    |                    |                    |                    |                    |                    |                    |
|----------------------|----|---------------------------|--------------------|--------------------|--------------------|--------------------|--------------------|--------------------|--------------------|--------------------|--------------------|-------------------------|--------------------|--------------------|--------------------|--------------------|--------------------|--------------------|--------------------|--------------------|--------------------|
|                      |    | BA17<br>vs<br>BA20        | BA17<br>vs<br>BA21 | BA17<br>vs<br>HCA1 | BA17<br>vs<br>MCA1 | BA20<br>vs<br>BA21 | BA20<br>vs<br>HCA1 | BA20<br>vs<br>MCA1 | BA21<br>vs<br>HCA1 | BA21<br>vs<br>MCA1 | HCA1<br>vs<br>MCA1 | BA17<br>vs<br>BA20      | BA17<br>vs<br>BA21 | BA17<br>vs<br>HCA1 | BA17<br>vs<br>MCA1 | BA20<br>vs<br>BA21 | BA20<br>vs<br>HCA1 | BA20<br>vs<br>MCA1 | BA21<br>vs<br>HCA1 | BA21<br>vs<br>MCA1 | HCA1<br>vs<br>MCA1 |
| Terminal<br>Apical C | O1 | ns                        | ns                 | ****               | ****               | ns                 | ****               | ****               | ns                 | ****               | ****               | ****                    | ****               | ****               | ns                 | ****               | ****               | ****               | ns                 | ****               | ****               |
|                      | O2 | ns                        | ns                 | ****               | ****               | ns                 | ****               | ****               | ****               | ****               | ****               | ****                    | ****               | ****               | ns                 | ****               | ****               | ****               | ns                 | ****               | ****               |
|                      | O3 | ns                        | ns                 | ****               | ****               | ns                 | ****               | ****               | ****               | ****               | ****               | ****                    | ****               | ****               | ns                 | ***                | ****               | ****               | ns                 | ****               | ****               |
|                      | O4 | ns                        | ns                 | ****               | **                 | ns                 | ****               | ****               | **                 | ****               | ****               | ****                    | **                 | ****               | ns                 | ns                 | ns                 | ****               | ns                 | ***                | ****               |
| Terminal<br>Basal    | O2 | ns                        | ns                 | ***                | **                 | ns                 | ****               | **                 | ns                 | ****               | ****               | ****                    | ns                 | ****               | ns                 | *                  | ns                 | ****               | *                  | ns                 | ****               |
|                      | O3 | ns                        | ns                 | ****               | ****               | ns                 | ****               | ****               | ****               | ****               | ****               | ****                    | ****               | ****               | ns                 | **                 | ns                 | ****               | ns                 | ****               | ****               |
|                      | O4 | ns                        | *                  | ****               | ****               | ns                 | ****               | ****               | ****               | ****               | ****               | ****                    | ****               | ****               | ns                 | ****               | ns                 | ****               | **                 | ****               | ****               |
|                      | O5 | ns                        | ns                 | ****               | ****               | ns                 | ****               | ****               | ****               | ****               | ****               | ****                    | ****               | ****               | ns                 | ****               | ****               | ****               | ns                 | ****               | ****               |
|                      | O6 | ns                        | ns                 | **                 | ns                 | ns                 | ****               | ****               | ***                | ****               | ****               | ***                     | ns                 | ns                 | ns                 | ****               | ns                 | ****               | ns                 | **                 | ***                |

**Supplementary Table 10:** Statistical comparisons of basal spine density values per distance from soma from graph shown in Figure 9C.

| $\mu\text{m}$ | Basal spine density |                    |                    |                    |                    |                    |                    |                    |                    |                    |
|---------------|---------------------|--------------------|--------------------|--------------------|--------------------|--------------------|--------------------|--------------------|--------------------|--------------------|
|               | BA17<br>vs<br>BA20  | BA17<br>vs<br>BA21 | BA17<br>vs<br>HCA1 | BA17<br>vs<br>MCA1 | BA20<br>vs<br>BA21 | BA20<br>vs<br>HCA1 | BA20<br>vs<br>MCA1 | BA21<br>vs<br>HCA1 | BA21<br>vs<br>MCA1 | HCA1<br>vs<br>MCA1 |
| 10            | ns                  | ns                 | ns                 | ns                 | ns                 | ns                 | ns                 | ns                 | ns                 | ns                 |
| 20            | ns                  | ns                 | ns                 | ns                 | ns                 | ns                 | **                 | ns                 | *                  | ns                 |
| 30            | ns                  | ns                 | ns                 | ns                 | ns                 | ns                 | ***                | ns                 | ***                | ns                 |
| 40            | ns                  | ns                 | ns                 | **                 | ns                 | ns                 | ***                | ns                 | ***                | ns                 |
| 50            | ns                  | ns                 | *                  | ****               | ns                 | ns                 | ****               | *                  | ****               | **                 |
| 60            | ns                  | ns                 | ***                | ****               | ns                 | **                 | ****               | **                 | ****               | *                  |
| 70            | *                   | ns                 | ****               | ****               | ns                 | ****               | ****               | ****               | ****               | ns                 |
| 80            | ns                  | ns                 | ****               | ****               | ns                 | ****               | ****               | ****               | ****               | ns                 |
| 90            | ns                  | ns                 | ***                | ****               | ns                 | **                 | ****               | ***                | ****               | ns                 |
| 100           | ns                  | ns                 | ****               | ****               | ns                 | ****               | ****               | ****               | ****               | ns                 |
| 110           | *                   | ns                 | ****               | ****               | ns                 | ****               | ****               | ****               | ****               | *                  |
| 120           | ns                  | ns                 | ****               | ****               | ns                 | ***                | ****               | ****               | ****               | ns                 |
| 130           | *                   | ns                 | ****               | ****               | ns                 | ****               | ****               | ****               | ****               | ns                 |
| 140           | ns                  | ns                 | ***                | **                 | ns                 | ***                | *                  | ****               | **                 | ns                 |
